# Supplementary material for: CRF07_BC is associated with slow HIV disease progression in Chinese patients
Source: PubMed Central journal article supplement (PMC8904811; doi:10.1038/s41598-022-07518-4), 2022-03-08
Supplement: 41598_2022_7518_MOESM1_ESM.pdf [file 41598_2022_7518_MOESM1_ESM.pdf]

## Supplementary Information

CRF07\_BC is associated with slow HIV disease progression in Chinese patients

Jingrong Ye<sup>1</sup>, Jing Chen<sup>1</sup>, Juan Wang<sup>1</sup>, Yuncong Wang<sup>1</sup>, Hui Xing<sup>2</sup><sup>¶\*</sup>, Fengting Yu<sup>3</sup>,  
Lifeng Liu<sup>4</sup>, Yang Han<sup>5</sup>, Huihuang Huang<sup>6</sup>, Yi Feng<sup>2</sup>, Yuhua Ruan<sup>2</sup>, Minna Zheng<sup>7</sup>,  
Xinli Lu<sup>8</sup>, Xiaoli Guo<sup>9</sup>, Hong Yang<sup>10</sup>, Qi Guo<sup>11</sup>, Yi Lin<sup>12</sup>, Jianjun Wu<sup>13</sup>, Shouli Wu<sup>14</sup>,  
Yilong Tang<sup>15</sup>, Xiaoguang Sun<sup>16</sup>, Xiaobai Zou<sup>17</sup>, Guolong Yu<sup>18</sup>, Jianjun Li<sup>19</sup>,  
Quanhua Zhou<sup>20</sup>, Ling Su<sup>21</sup>, Lincai Zhang<sup>22</sup>, Zhan Gao<sup>23</sup>, Ruolei Xin<sup>1</sup>, Shufang He<sup>1</sup>,  
Conghui Xu<sup>1</sup>, Mingqiang Hao<sup>1</sup>, Yinxiao Hao<sup>1</sup>, Xianlong Ren<sup>1</sup>, Jie Li<sup>1</sup>, Lishi  
Bai<sup>1</sup>, Tianjun Jiang<sup>6</sup>, Tong Zhang<sup>4</sup>, Yiming Shao<sup>2</sup><sup>¶\*</sup>, Hongyan Lu<sup>1</sup><sup>¶\*</sup>

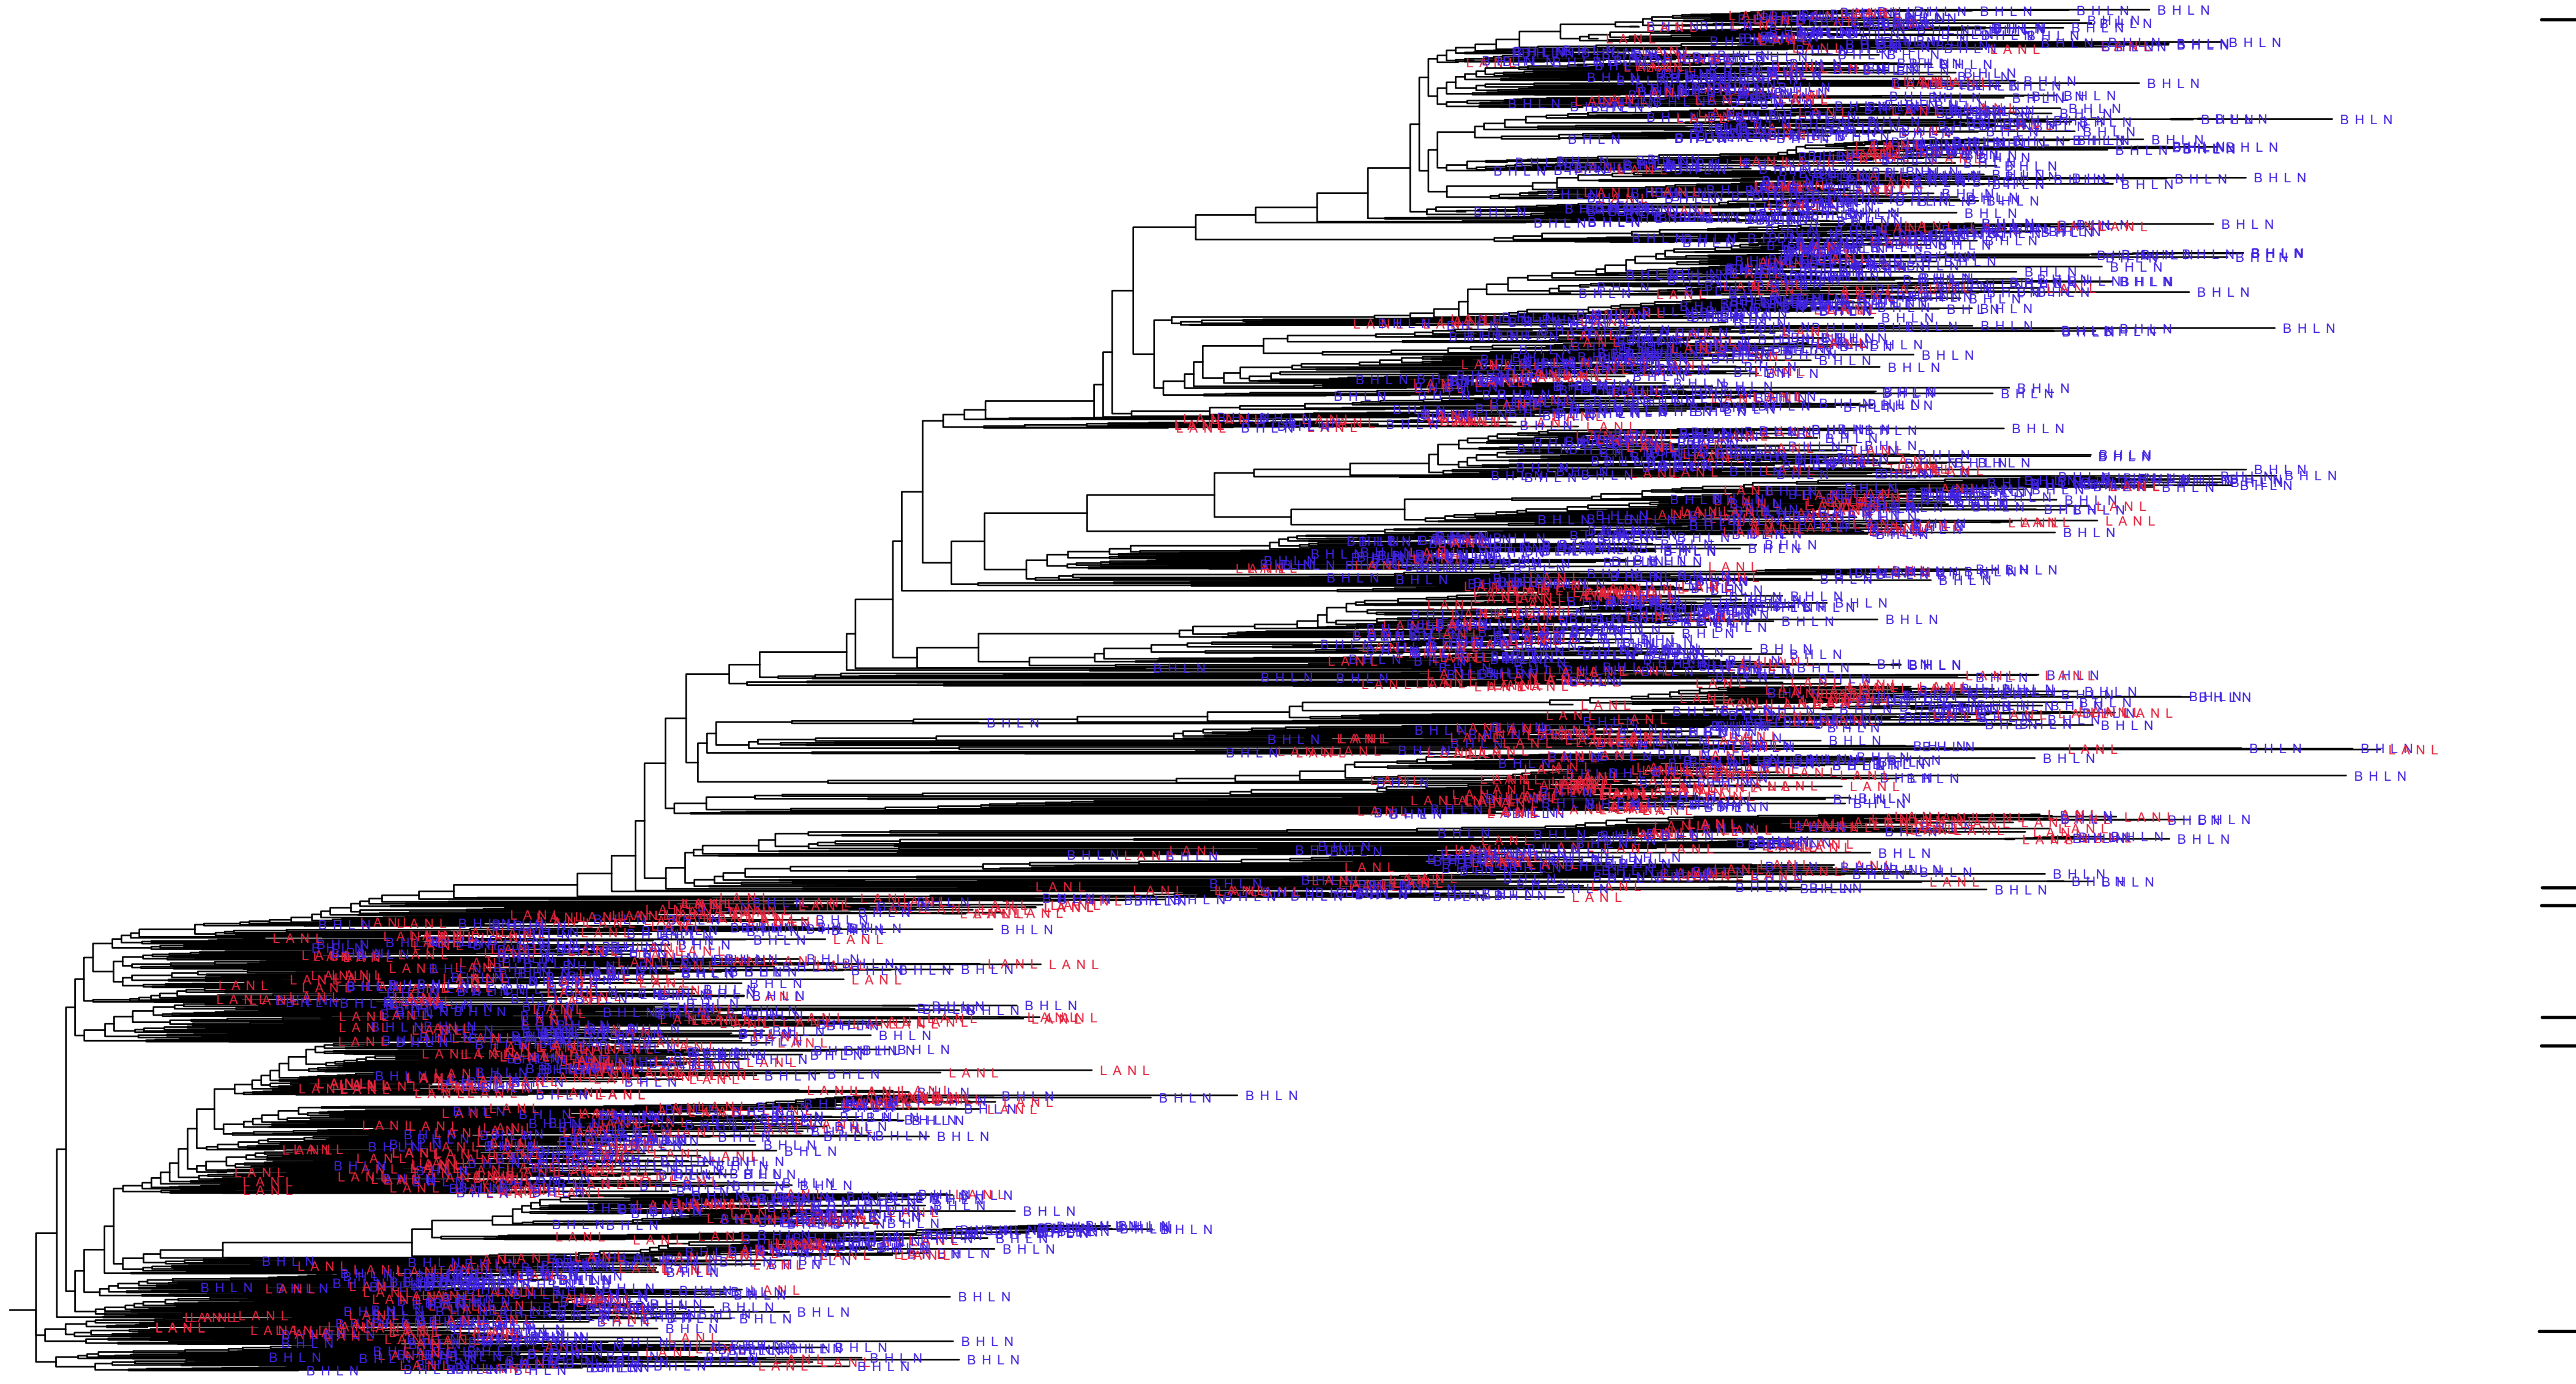

C1

C2

C3

0.02

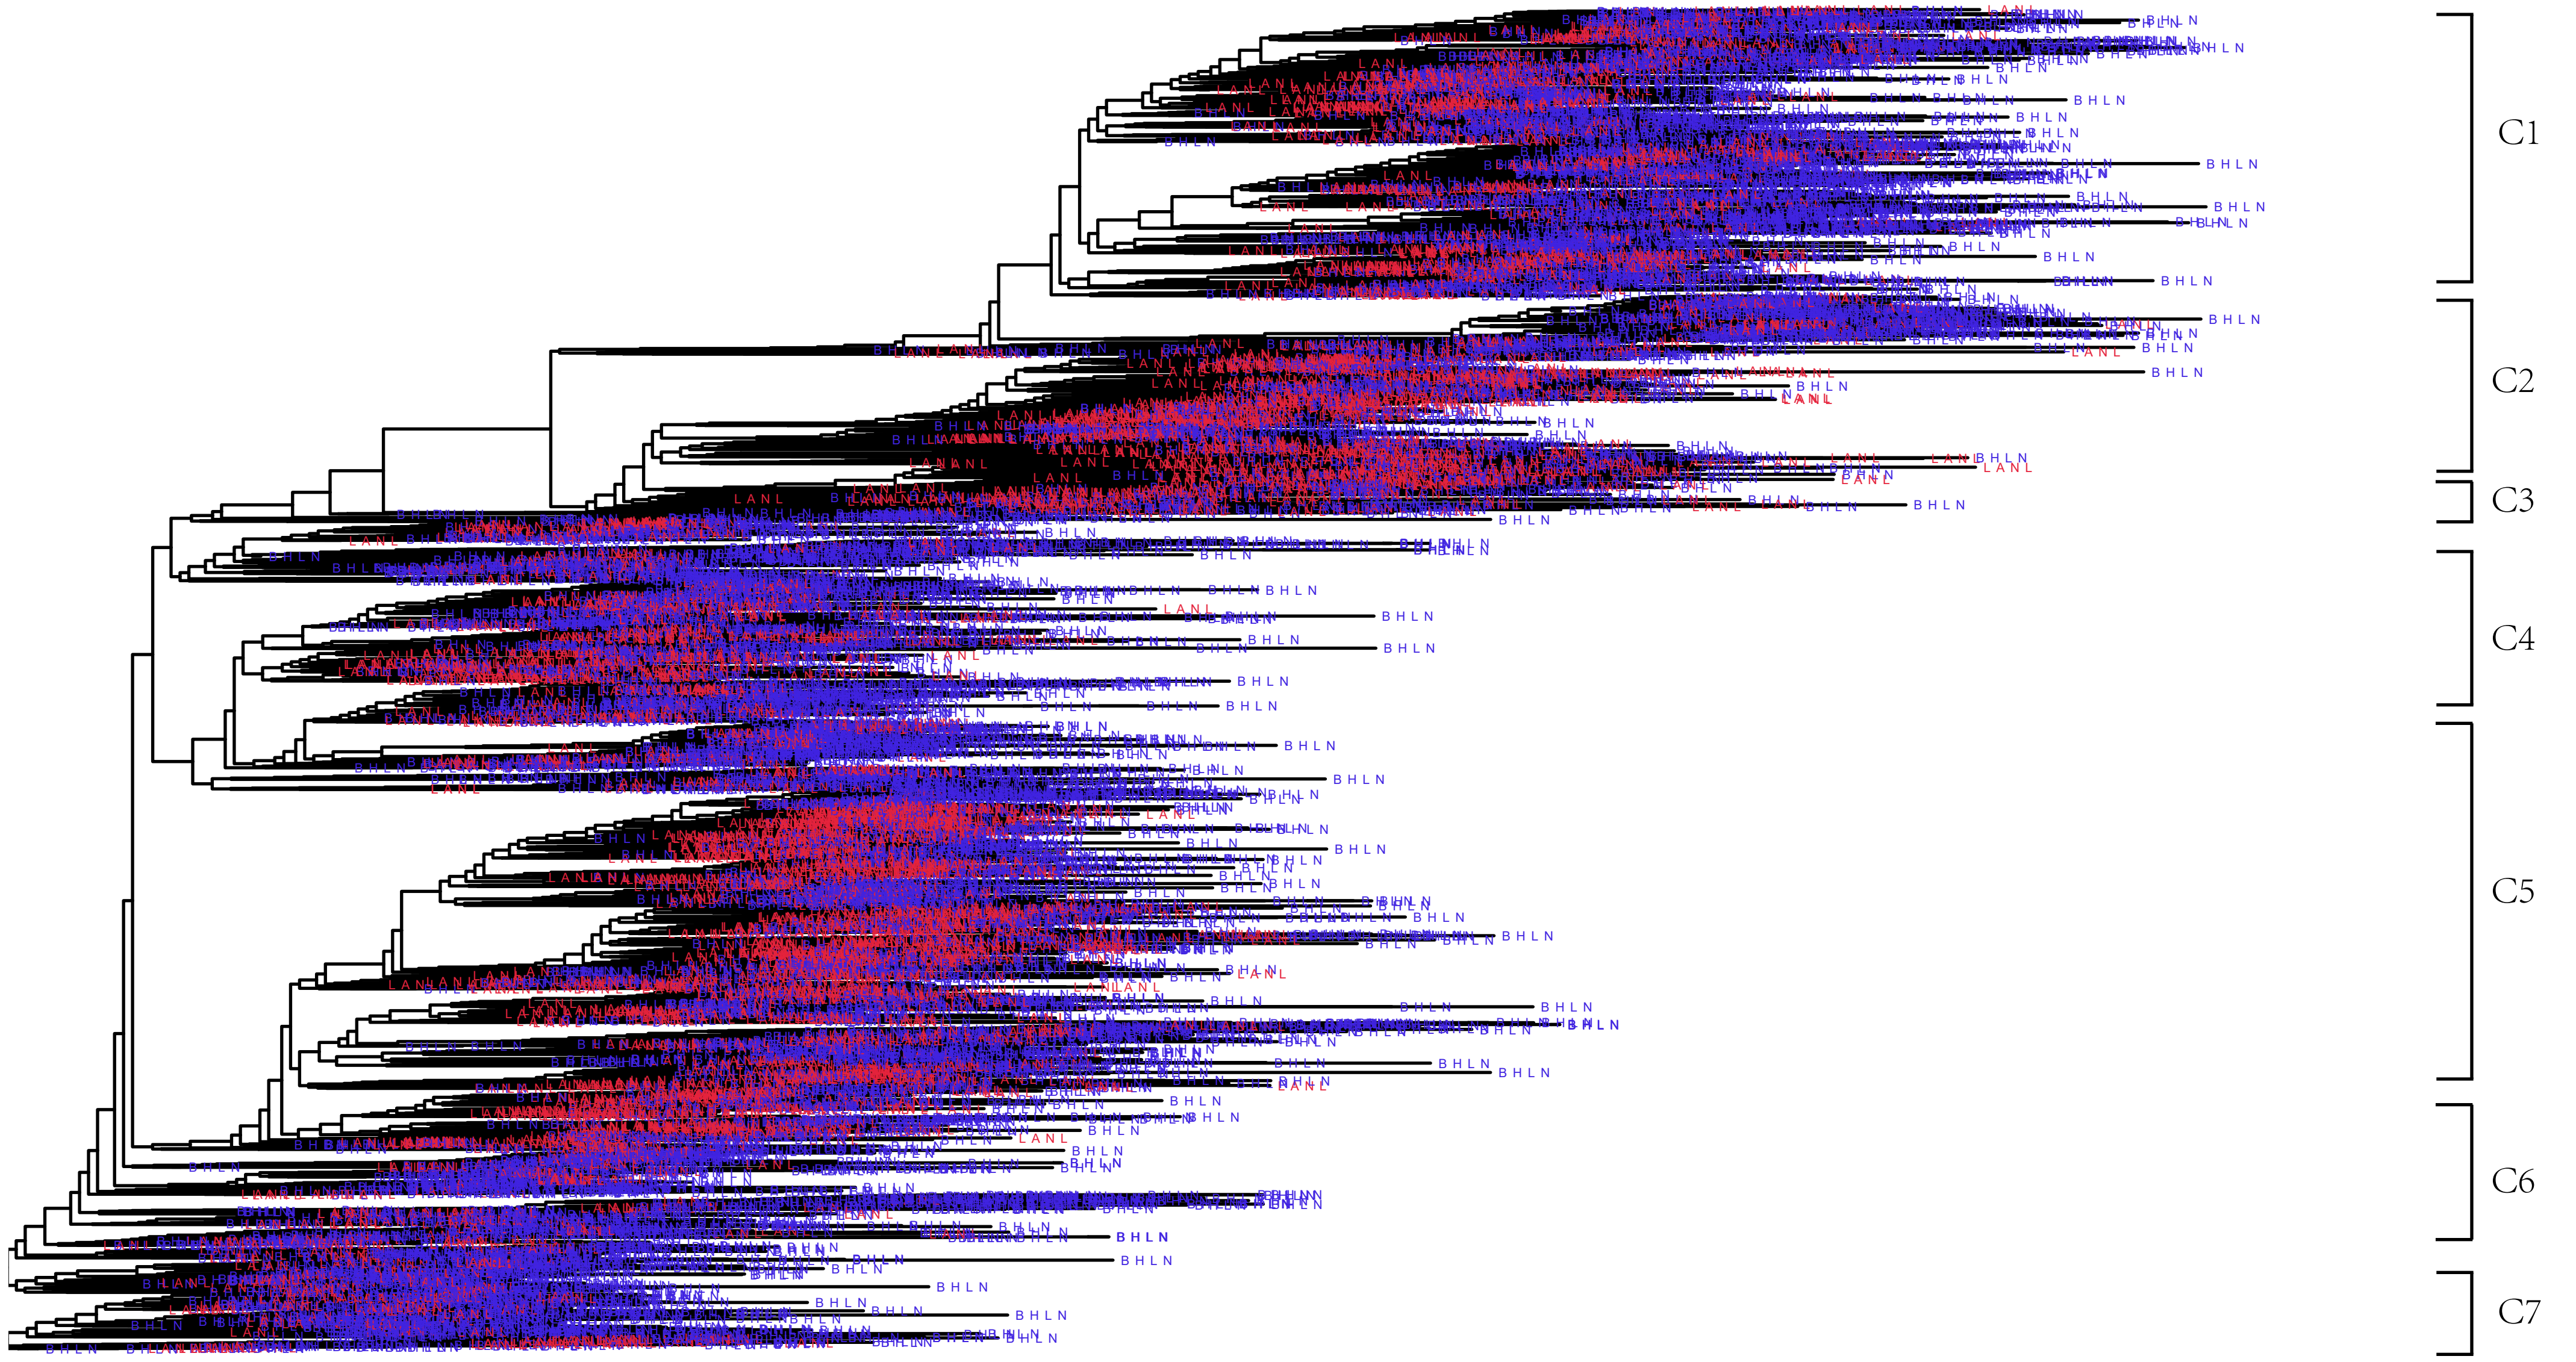

C1

C2

C3

C4

C5

C6

C7

0.02

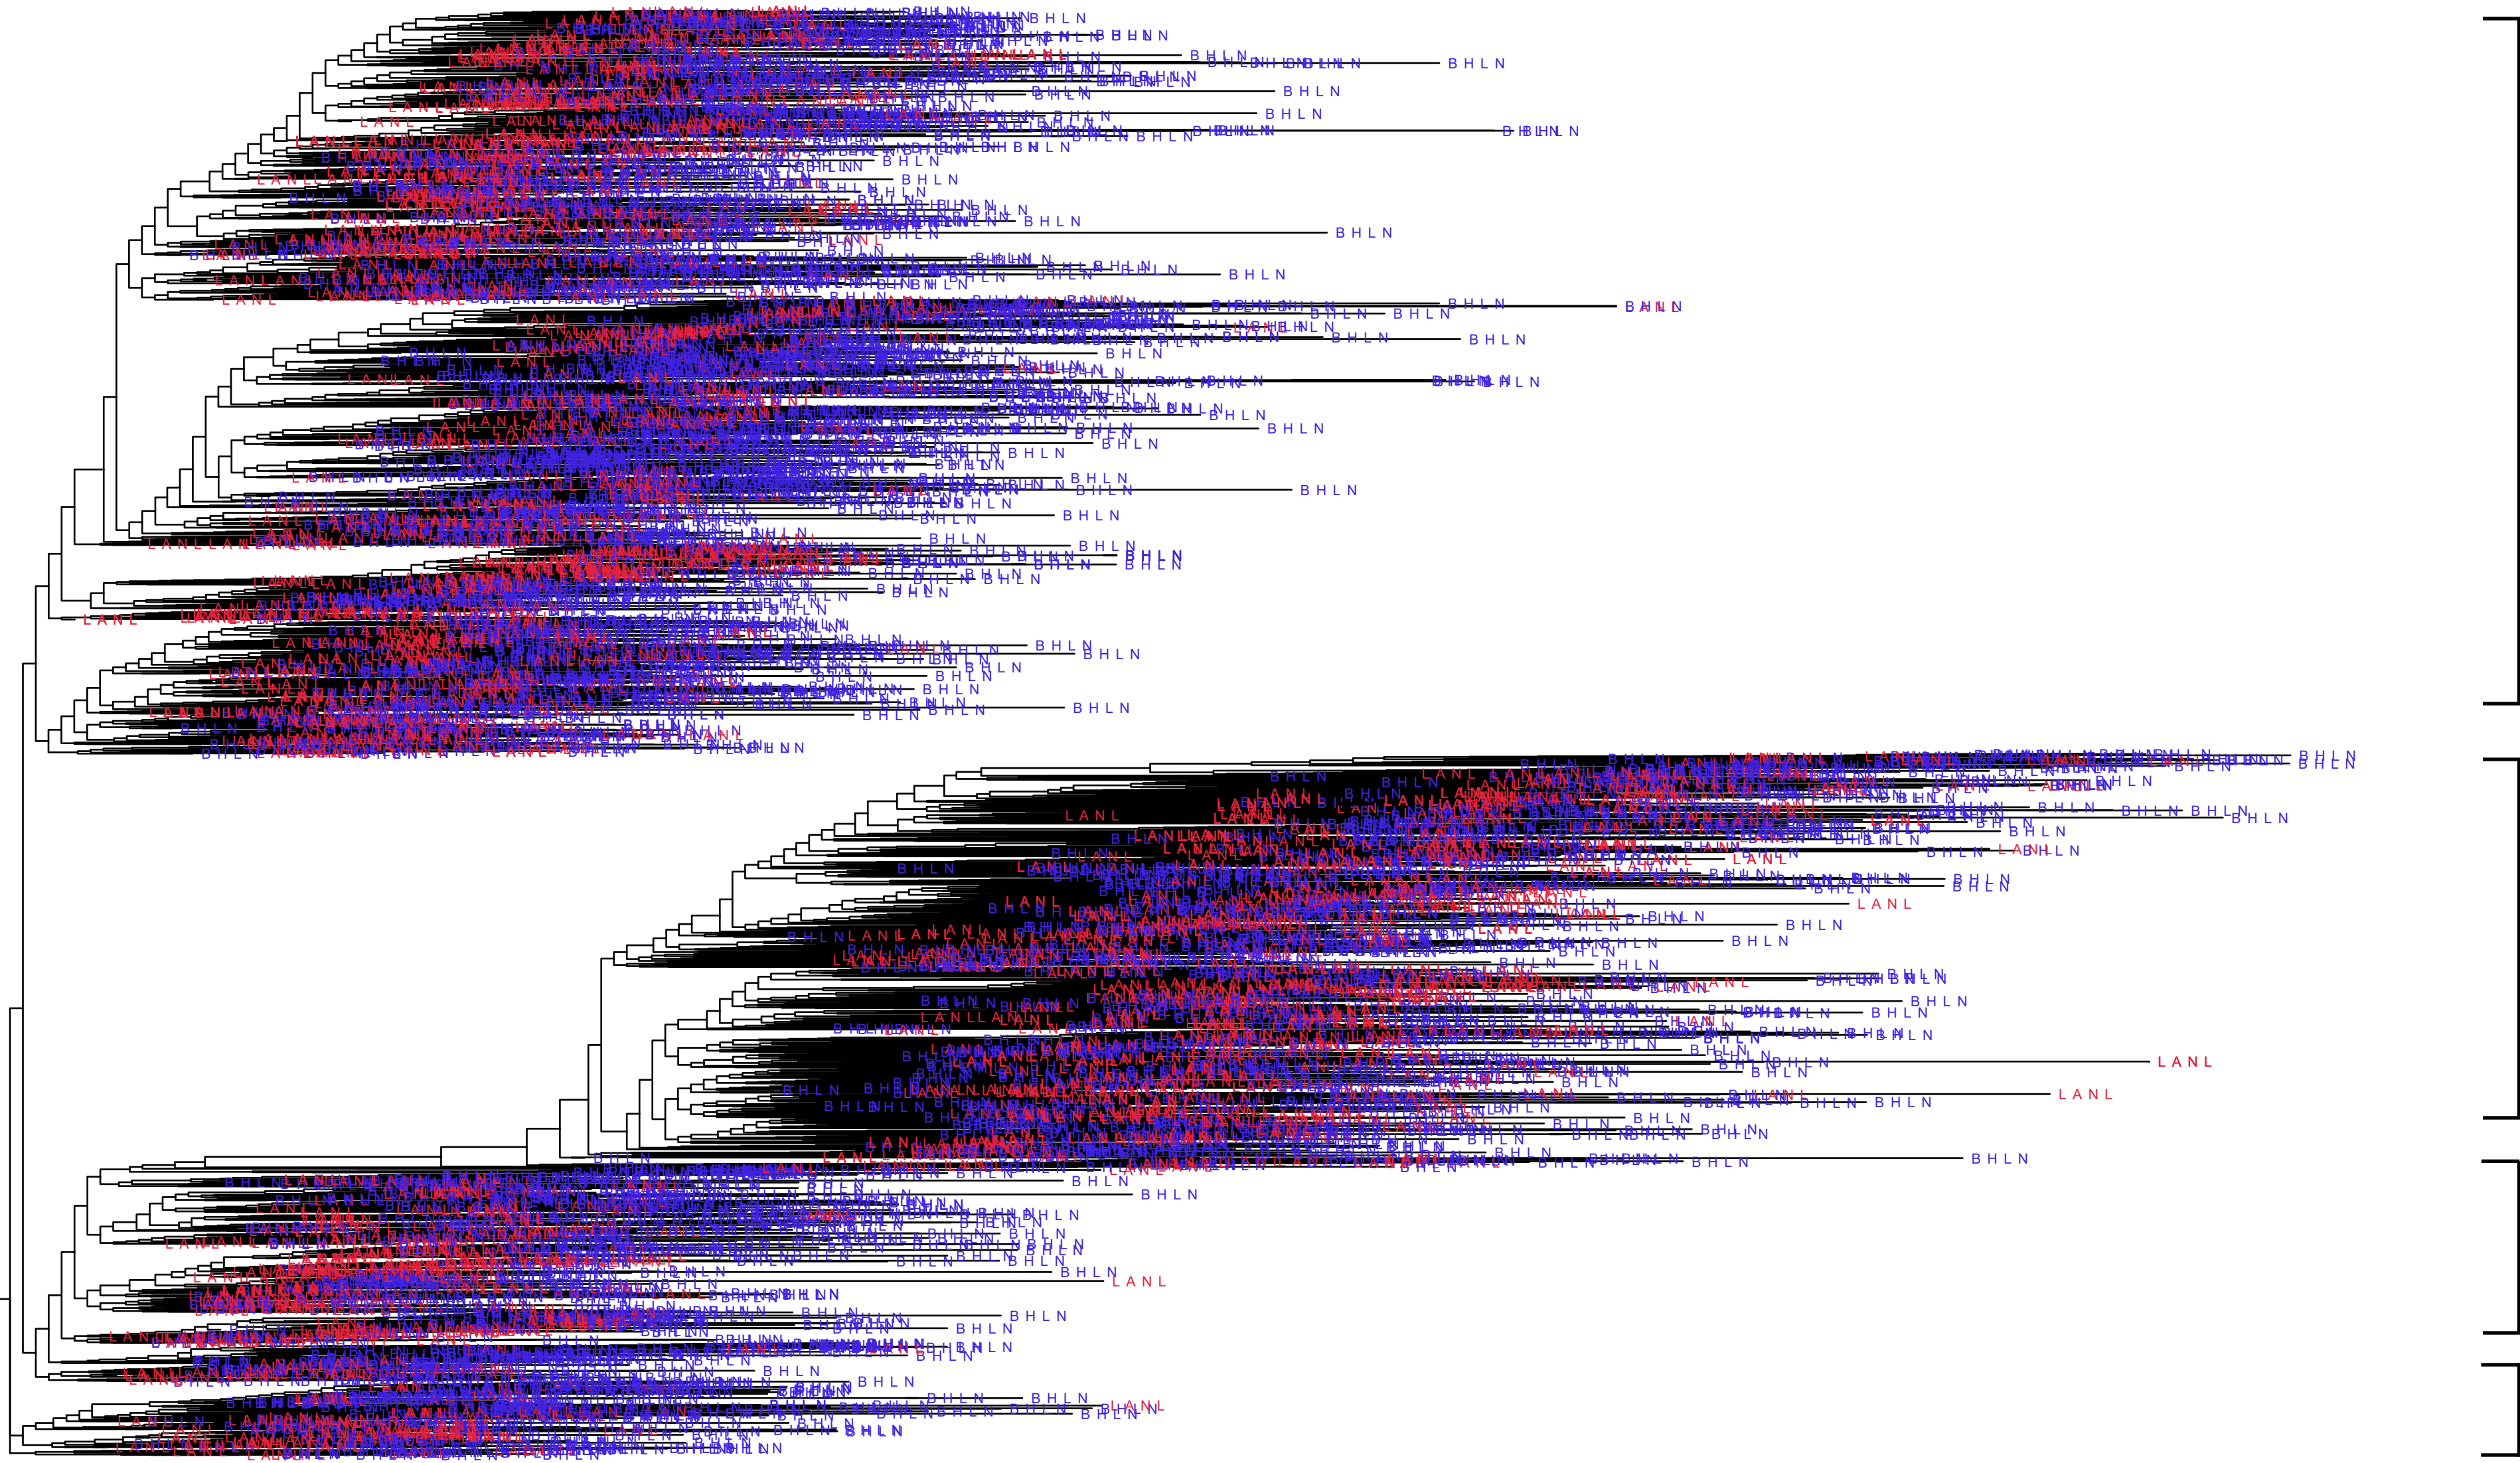

C1

C2

C3

C4

FigS1. The maximum likelihood phylogenetic tree of HIV subtype B *pol* sequences

The trees were constructed from nucleotide sequences corresponding to HXB2 nucleotide 2273 to 3276 using the GTR+CAT nucleotide substitution model in FastTree package. BHLN in blue indicate that the sequence is from Beijing HIV laboratory network(BHLN). LANL in red indicate that the sequence is Los Alamos HIV sequence database (LANL). A distance scale is shown at the bottom of the tree.

FigS2. The maximum likelihood phylogenetic tree of HIV CRF01\_AE *pol* sequences

The trees were constructed from nucleotide sequences corresponding to HXB2 nucleotide 2273 to 3276 using the GTR+CAT nucleotide substitution model in FastTree package. BHLN in blue indicate that the sequence is from Beijing HIV laboratory network(BHLN). LANL in red indicate that the sequence is Los Alamos HIV sequence database (LANL). A distance scale is shown at the bottom of the tree.

FigS3. The maximum likelihood phylogenetic tree of HIV CRF07\_BC *pol* sequences

The trees were constructed from nucleotide sequences corresponding to HXB2 nucleotide 2273 to 3276 using the GTR+CAT nucleotide substitution model in FastTree package. BHLN in blue indicate that the sequence is from Beijing HIV laboratory network(BHLN). LANL in red indicate that the sequence is Los Alamos HIV sequence database (LANL). A distance scale is shown at the bottom of the tree.

Table S1. HIV subtype trend for transmission risk group

|                   | 1994-2005  | 2006-2008   | 2009-2011   | 2012-2014   | 2015-2017   | 2018-2020   | Total       |
|-------------------|------------|-------------|-------------|-------------|-------------|-------------|-------------|
| Heterosexual      |            |             |             |             |             |             |             |
| 01_AE             | 54(36.24)  | 259(42.05)  | 428(40.96)  | 420(46.1)   | 360(43.01)  | 520(42.38)  | 2041(42.65) |
| 07_BC             | 17(11.41)  | 105(17.05)  | 187(17.89)  | 192(21.08)  | 234(27.96)  | 353(28.77)  | 1088(22.74) |
| 08_BC             | 10(6.71)   | 54(8.77)    | 55(5.26)    | 48(5.27)    | 18(2.15)    | 22(1.79)    | 207(4.33)   |
| 55_01B            | 1(0.67)    | 1(0.16)     | 14(1.34)    | 9(0.99)     | 10(1.19)    | 41(3.34)    | 76(1.59)    |
| B                 | 45(30.2)   | 152(24.68)  | 196(18.76)  | 131(14.38)  | 109(13.02)  | 102(8.31)   | 735(15.36)  |
| C                 | 9(6.04)    | 12(1.95)    | 59(5.65)    | 27(2.96)    | 14(1.67)    | 12(0.98)    | 133(2.78)   |
| Minor             | 6(4.03)    | 18(2.92)    | 43(4.11)    | 30(3.29)    | 31(3.7)     | 62(5.05)    | 190(3.97)   |
| URF               | 7(4.7)     | 15(2.44)    | 63(6.03)    | 54(5.93)    | 61(7.29)    | 115(9.37)   | 315(6.58)   |
| Total             | 149(100)   | 616(100.02) | 1045(100)   | 911(100)    | 837(99.99)  | 1227(99.99) | 4785(100)   |
| MSM               |            |             |             |             |             |             |             |
| 01_AE             | 14(28)     | 349(47.04)  | 1926(53.78) | 2129(51.67) | 1405(49.01) | 1033(45.01) | 6856(50.21) |
| 07_BC             | 2(4)       | 108(14.56)  | 880(24.57)  | 1137(27.6)  | 815(28.43)  | 730(31.81)  | 3672(26.89) |
| 08_BC             | 1(2)       | 2(0.27)     | 5(0.14)     | 11(0.27)    | 11(0.38)    | 9(0.39)     | 39(0.29)    |
| 55_01B            | 0(0)       | 27(3.64)    | 94(2.62)    | 139(3.37)   | 56(1.95)    | 56(2.44)    | 372(2.72)   |
| B                 | 33(66)     | 242(32.61)  | 547(15.28)  | 426(10.34)  | 260(9.07)   | 132(5.75)   | 1640(12.01) |
| C                 | 0(0)       | 2(0.27)     | 5(0.14)     | 14(0.34)    | 11(0.38)    | 7(0.31)     | 39(0.29)    |
| Minor             | 0(0)       | 6(0.81)     | 54(1.51)    | 54(1.31)    | 65(2.27)    | 75(3.27)    | 254(1.86)   |
| URF               | 0(0)       | 6(0.81)     | 70(1.95)    | 210(5.1)    | 244(8.51)   | 253(11.02)  | 783(5.73)   |
| Total             | 50(100)    | 742(100.01) | 3581(99.99) | 4120(100)   | 2867(100)   | 2295(100)   | 13655(100)  |
| IDU               |            |             |             |             |             |             |             |
| 01_AE             | 13(11.71)  | 51(12.2)    | 26(3.65)    | 31(15.27)   | 28(26.17)   | 12(35.29)   | 161(10.16)  |
| 07_BC             | 53(47.75)  | 260(62.2)   | 553(77.67)  | 84(41.38)   | 56(52.34)   | 12(35.29)   | 1018(64.23) |
| 08_BC             | 13(11.71)  | 45(10.77)   | 9(1.26)     | 33(16.26)   | 4(3.74)     | 1(2.94)     | 105(6.62)   |
| 55_01B            | 0(0)       | 0(0)        | 0(0)        | 1(0.49)     | 0(0)        | 2(5.88)     | 3(0.19)     |
| B                 | 9(8.11)    | 13(3.11)    | 27(3.79)    | 6(2.96)     | 7(6.54)     | 1(2.94)     | 63(3.97)    |
| C                 | 12(10.81)  | 14(3.35)    | 41(5.76)    | 13(6.4)     | 0(0)        | 0(0)        | 80(5.05)    |
| Minor             | 0(0)       | 8(1.91)     | 15(2.11)    | 10(4.93)    | 3(2.8)      | 0(0)        | 36(2.27)    |
| URF               | 11(9.91)   | 27(6.46)    | 41(5.76)    | 25(12.32)   | 9(8.41)     | 6(17.65)    | 119(7.51)   |
| Total             | 111(100)   | 418(100)    | 712(100)    | 203(100.01) | 107(100)    | 34(99.99)   | 1585(100)   |
| Blood transfusion |            |             |             |             |             |             |             |
| 01_AE             | 18(9.47)   | 7(3.98)     | 14(17.72)   | 2(12.5)     | 0(0)        | 0(0)        | 41(8.89)    |
| 07_BC             | 11(5.79)   | 8(4.55)     | 4(5.06)     | 8(50)       | 0(0)        | 0(0)        | 31(6.72)    |
| 08_BC             | 2(1.05)    | 0(0)        | 0(0)        | 1(6.25)     | 0(0)        | 0(0)        | 3(0.65)     |
| 55_01B            | 0(0)       | 0(0)        | 0(0)        | 0(0)        | 0(0)        | 0(0)        | 0(0)        |
| B                 | 154(81.05) | 159(90.34)  | 60(75.95)   | 5(31.25)    | 0(0)        | 0(0)        | 378(82)     |
| C                 | 0(0)       | 0(0)        | 0(0)        | 0(0)        | 0(0)        | 0(0)        | 0(0)        |
| Minor             | 5(2.63)    | 2(1.14)     | 0(0)        | 0(0)        | 0(0)        | 0(0)        | 7(1.52)     |
| URF               | 0(0)       | 0(0)        | 1(1.27)     | 0(0)        | 0(0)        | 0(0)        | 1(0.22)     |
| Total             | 190(99.99) | 176(100.01) | 79(100)     | 16(100)     | 0(0)        | 0(0)        | 461(100)    |
| Mother to         |            |             |             |             |             |             |             |

|          |         |         |          |        |      |      |         |
|----------|---------|---------|----------|--------|------|------|---------|
| children |         |         |          |        |      |      |         |
| 01_AE    | 2(20)   | 1(10)   | 2(33.33) | 1(25)  | 0(0) | 0(0) | 6(20)   |
| 07_BC    | 1(10)   | 0(0)    | 2(33.33) | 0(0)   | 0(0) | 0(0) | 3(10)   |
| 08_BC    | 0(0)    | 2(20)   | 0(0)     | 0(0)   | 0(0) | 0(0) | 2(6.67) |
| 55_01B   | 0(0)    | 0(0)    | 0(0)     | 0(0)   | 0(0) | 0(0) | 0(0)    |
| B        | 6(60)   | 6(60)   | 1(16.67) | 2(50)  | 0(0) | 0(0) | 15(50)  |
| C        | 0(0)    | 0(0)    | 0(0)     | 1(25)  | 0(0) | 0(0) | 1(3.33) |
| Minor    | 1(10)   | 1(10)   | 1(16.67) | 0(0)   | 0(0) | 0(0) | 3(10)   |
| URF      | 0(0)    | 0(0)    | 0(0)     | 0(0)   | 0(0) | 0(0) | 0(0)    |
| Total    | 10(100) | 10(100) | 6(100)   | 4(100) | 0(0) | 0(0) | 30(100) |

Data are n(%).

MSM, Man who have sex with man.

URF, unique recombinant form.

Minor,A1, D, F1, G, H, CRF02\_AG, CRF03\_AB, CRF06\_cpx, CRF15\_01B, CRF18\_cpx, CRF24\_BG, CRF33\_01B, CRF55\_01B, CRF57\_BC, CRF58\_01B, CRF59\_01B, CRF61\_BC, CRF62\_BC, CRF63\_02A1, CRF64\_BC, CRF65\_cpx, CRF67\_01B, CRF68\_01B, CRF78\_cpx, CRF79\_0107, CRF82\_cpx, CRF83\_cpx, CRF85\_BC, CRF86\_BC, CRF87\_cpx, CRF88\_BC, and CRF96\_cpx.

Table S2. HIV subtype trend for region

|               | 1994-2005   | 2006-2008   | 2009-2011    | 2012-2014    | 2015-2017   | 2018-2020    | Total        |
|---------------|-------------|-------------|--------------|--------------|-------------|--------------|--------------|
| North         |             |             |              |              |             |              |              |
| 01_AE         | 15(14.42)   | 222(40.07)  | 608(48.64)   | 903(52.47)   | 950(48.92)  | 762(44.33)   | 3460(47.46)  |
| 07_BC         | 17(16.35)   | 71(12.82)   | 256(20.48)   | 397(23.07)   | 498(25.64)  | 499(29.03)   | 1738(23.84)  |
| 08_BC         | 3(2.88)     | 6(1.08)     | 5(0.4)       | 5(0.29)      | 12(0.62)    | 18(1.05)     | 49(0.67)     |
| 55_01B        | 0(0)        | 4(0.72)     | 7(0.56)      | 15(0.87)     | 30(1.54)    | 45(2.62)     | 101(1.39)    |
| B             | 62(59.62)   | 221(39.89)  | 327(26.16)   | 261(15.17)   | 213(10.97)  | 114(6.63)    | 1198(16.43)  |
| C             | 2(1.92)     | 10(1.81)    | 6(0.48)      | 13(0.76)     | 14(0.72)    | 12(0.7)      | 57(0.78)     |
| Minor         | 4(3.85)     | 14(2.53)    | 18(1.44)     | 23(1.34)     | 58(2.99)    | 84(4.89)     | 201(2.76)    |
| URF           | 1(0.96)     | 6(1.08)     | 23(1.84)     | 104(6.04)    | 167(8.6)    | 185(10.76)   | 486(6.67)    |
| Total         | 104(100)    | 554(100)    | 1250(100)    | 1721(100.01) | 1942(100)   | 1719(100.01) | 7290(100)    |
| North-east    |             |             |              |              |             |              |              |
| 01_AE         | 17(21.79)   | 37(35.58)   | 351(68.42)   | 230(58.52)   | 275(52.38)  | 301(53.65)   | 1211(55.7)   |
| 07_BC         | 10(12.82)   | 11(10.58)   | 60(11.7)     | 82(20.87)    | 151(28.76)  | 146(26.02)   | 460(21.16)   |
| 08_BC         | 4(5.13)     | 7(6.73)     | 0(0)         | 0(0)         | 3(0.57)     | 1(0.18)      | 15(0.69)     |
| 55_01B        | 0(0)        | 1(0.96)     | 1(0.19)      | 3(0.76)      | 2(0.38)     | 14(2.5)      | 21(0.97)     |
| B             | 36(46.15)   | 44(42.31)   | 78(15.2)     | 49(12.47)    | 43(8.19)    | 31(5.53)     | 281(12.93)   |
| C             | 1(1.28)     | 2(1.92)     | 4(0.78)      | 2(0.51)      | 1(0.19)     | 3(0.53)      | 13(0.6)      |
| Minor         | 7(8.97)     | 2(1.92)     | 11(2.14)     | 6(1.53)      | 11(2.1)     | 15(2.67)     | 52(2.39)     |
| URF           | 3(3.85)     | 0(0)        | 8(1.56)      | 21(5.34)     | 39(7.43)    | 50(8.91)     | 121(5.57)    |
| Total         | 78(99.99)   | 104(100)    | 513(99.99)   | 393(100)     | 525(100)    | 561(99.99)   | 2174(100.01) |
| East          |             |             |              |              |             |              |              |
| 01_AE         | 30(37.97)   | 131(44.41)  | 713(61.73)   | 809(58.37)   | 234(50.76)  | 191(43.71)   | 2108(55.28)  |
| 07_BC         | 10(12.66)   | 41(13.9)    | 223(19.31)   | 360(25.97)   | 116(25.16)  | 137(31.35)   | 887(23.26)   |
| 08_BC         | 5(6.33)     | 23(7.8)     | 10(0.87)     | 7(0.51)      | 3(0.65)     | 4(0.92)      | 52(1.36)     |
| 55_01B        | 0(0)        | 0(0)        | 7(0.61)      | 29(2.09)     | 16(3.47)    | 14(3.2)      | 66(1.73)     |
| B             | 27(34.18)   | 82(27.8)    | 159(13.77)   | 109(7.86)    | 38(8.24)    | 34(7.78)     | 449(11.78)   |
| C             | 4(5.06)     | 3(1.02)     | 2(0.17)      | 2(0.14)      | 5(1.08)     | 1(0.23)      | 17(0.45)     |
| Minor         | 1(1.27)     | 8(2.71)     | 24(2.08)     | 26(1.88)     | 15(3.25)    | 14(3.2)      | 88(2.31)     |
| URF           | 2(2.53)     | 7(2.37)     | 17(1.47)     | 44(3.17)     | 34(7.38)    | 42(9.61)     | 146(3.83)    |
| Total         | 79(100)     | 295(100.01) | 1155(100.01) | 1386(99.99)  | 461(99.99)  | 437(100)     | 3813(100)    |
| Central-south |             |             |              |              |             |              |              |
| 01_AE         | 27(18.24)   | 236(33.38)  | 512(42.81)   | 460(42.36)   | 180(38.79)  | 177(40.41)   | 1592(39.42)  |
| 07_BC         | 4(2.7)      | 158(22.35)  | 333(27.84)   | 350(32.23)   | 162(34.91)  | 146(33.33)   | 1153(28.55)  |
| 08_BC         | 0(0)        | 49(6.93)    | 27(2.26)     | 15(1.38)     | 3(0.65)     | 3(0.68)      | 97(2.4)      |
| 55_01B        | 1(0.68)     | 23(3.25)    | 91(7.61)     | 97(8.93)     | 12(2.59)    | 19(4.34)     | 243(6.02)    |
| B             | 112(75.68)  | 215(30.41)  | 175(14.63)   | 105(9.67)    | 50(10.78)   | 29(6.62)     | 686(16.98)   |
| C             | 1(0.68)     | 5(0.71)     | 4(0.33)      | 4(0.37)      | 3(0.65)     | 2(0.46)      | 19(0.47)     |
| Minor         | 2(1.35)     | 5(0.71)     | 15(1.25)     | 8(0.74)      | 11(2.37)    | 11(2.51)     | 52(1.29)     |
| URF           | 1(0.68)     | 16(2.26)    | 39(3.26)     | 47(4.33)     | 43(9.27)    | 51(11.64)    | 197(4.88)    |
| Total         | 148(100.01) | 707(100)    | 1196(99.99)  | 1086(100.01) | 464(100.01) | 438(99.99)   | 4039(100.01) |
| South-west    |             |             |              |              |             |              |              |



|            |           |             |             |             |            |             |             |
|------------|-----------|-------------|-------------|-------------|------------|-------------|-------------|
| 01_AE      | 13(18.31) | 37(22.84)   | 169(14.32)  | 128(24.76)  | 69(29.49)  | 64(29.63)   | 480(20.17)  |
| 07_BC      | 8(11.27)  | 55(33.95)   | 687(58.22)  | 170(32.88)  | 103(44.02) | 101(46.76)  | 1124(47.23) |
| 08_BC      | 13(18.31) | 17(10.49)   | 25(2.12)    | 64(12.38)   | 12(5.13)   | 6(2.78)     | 137(5.76)   |
| 55_01B     | 0(0)      | 0(0)        | 2(0.17)     | 3(0.58)     | 6(2.56)    | 5(2.31)     | 16(0.67)    |
| B          | 11(15.49) | 19(11.73)   | 78(6.61)    | 24(4.64)    | 12(5.13)   | 7(3.24)     | 151(6.34)   |
| C          | 14(19.72) | 8(4.94)     | 89(7.54)    | 33(6.38)    | 4(1.71)    | 1(0.46)     | 149(6.26)   |
| Minor      | 0(0)      | 8(4.94)     | 43(3.64)    | 30(5.8)     | 3(1.28)    | 7(3.24)     | 91(3.82)    |
| URF        | 12(16.9)  | 18(11.11)   | 87(7.37)    | 65(12.57)   | 25(10.68)  | 25(11.57)   | 232(9.75)   |
| Total      | 71(100)   | 162(100)    | 1180(99.99) | 517(99.99)  | 234(100)   | 216(99.99)  | 2380(100)   |
| North-west |           |             |             |             |            |             |             |
| 01_AE      | 1(2.27)   | 16(8.7)     | 50(33.78)   | 56(36.13)   | 88(44.44)  | 68(37.78)   | 279(30.69)  |
| 07_BC      | 40(90.91) | 149(80.98)  | 74(50)      | 65(41.94)   | 78(39.39)  | 66(36.67)   | 472(51.93)  |
| 08_BC      | 1(2.27)   | 1(0.54)     | 2(1.35)     | 2(1.29)     | 0(0)       | 0(0)        | 6(0.66)     |
| 55_01B     | 0(0)      | 0(0)        | 0(0)        | 2(1.29)     | 0(0)       | 2(1.11)     | 4(0.44)     |
| B          | 2(4.55)   | 13(7.07)    | 18(12.16)   | 21(13.55)   | 21(10.61)  | 19(10.56)   | 94(10.34)   |
| C          | 0(0)      | 2(1.09)     | 0(0)        | 0(0)        | 0(0)       | 0(0)        | 2(0.22)     |
| Minor      | 0(0)      | 1(0.54)     | 3(2.03)     | 1(0.65)     | 3(1.52)    | 5(2.78)     | 13(1.43)    |
| URF        | 0(0)      | 2(1.09)     | 1(0.68)     | 8(5.16)     | 8(4.04)    | 20(11.11)   | 39(4.29)    |
|            | 44(100)   | 184(100.01) | 148(100)    | 155(100.01) | 198(100)   | 180(100.01) | 909(100)    |

Data are n(%).

MSM, Man who have sex with man.

North, Beijing, Tianjin, Hebei, Shanxi, and Inner Mongolia.

North-east, Liaoning, Jilin, and Heilongjiang.

East, Shanghai, Jiangsu, Zhejiang, Anhui, Fujian, Jiangxi, and Shandong.

Central- south, Henan, Hubei, Hunan, Guangdong, Guangxi, and Hainan.

South-west, Chongqing, Sichuan, Guizhou, Yunnan, and Tibet.

North-west, Shann'xi, Gansu, Qinghai, Ningxia, and Sinkiang.

URF, unique recombinant form.

Minor, A1, D, F1, G, H, CRF02\_AG, CRF03\_AB, CRF06\_cpx, CRF15\_01B, CRF18\_cpx, CRF24\_BG, CRF33\_01B, CRF55\_01B, CRF57\_BC, CRF58\_01B, CRF59\_01B, CRF61\_BC, CRF62\_BC, CRF63\_02A1, CRF64\_BC, CRF65\_cpx, CRF67\_01B, CRF68\_01B, CRF78\_cpx,

CRF79\_0107, CRF82\_cpx, CRF83\_cpx, CRF85\_BC, CRF86\_BC, CRF87\_cpx, CRF88\_BC,  
and CRF96\_cpx.

Table S3. HIV subtype trend for sex

|              | 1994-2005   | 2006-2008  | 2009-2011   | 2012-2014    | 2015-2017   | 2018-2020   | Total         |
|--------------|-------------|------------|-------------|--------------|-------------|-------------|---------------|
| <b>Men</b>   |             |            |             |              |             |             |               |
| 01_AE        | 25(14.79)   | 417(35.89) | 2148(51.61) | 2387(50.64)  | 1747(47.85) | 1477(44.85) | 8201(47.82)   |
| 07_BC        | 52(30.77)   | 295(25.39) | 1047(25.16) | 1321(28.02)  | 1046(28.65) | 1001(30.4)  | 4762(27.77)   |
| 08_BC        | 3(1.78)     | 16(1.38)   | 16(0.38)    | 21(0.45)     | 26(0.71)    | 22(0.67)    | 104(0.61)     |
| 55_01B       | 0(0)        | 27(2.32)   | 98(2.35)    | 142(3.01)    | 65(1.78)    | 93(2.82)    | 425(2.48)     |
| B            | 80(47.34)   | 368(31.67) | 696(16.72)  | 525(11.14)   | 346(9.48)   | 202(6.13)   | 2217(12.93)   |
| C            | 4(2.37)     | 13(1.12)   | 10(0.24)    | 22(0.47)     | 19(0.52)    | 11(0.33)    | 79(0.46)      |
| Minor        | 4(2.37)     | 14(1.2)    | 62(1.49)    | 64(1.36)     | 92(2.52)    | 125(3.8)    | 361(2.1)      |
| URF          | 1(0.59)     | 12(1.03)   | 85(2.04)    | 232(4.92)    | 310(8.49)   | 362(10.99)  | 1002(5.84)    |
|              | 169(100.01) | 1162(100)  | 4162(99.99) | 4714(100.01) | 3651(100)   | 3293(99.99) | 17151(100.01) |
| <b>Women</b> |             |            |             |              |             |             |               |
| 01_AE        | 16(22.86)   | 25(13.3)   | 53(28.19)   | 49(28.65)    | 50(28.9)    | 91(34.08)   | 284(26.87)    |
| 07_BC        | 11(15.71)   | 58(30.85)  | 50(26.6)    | 48(28.07)    | 61(35.26)   | 95(35.58)   | 323(30.56)    |
| 08_BC        | 3(4.29)     | 14(7.45)   | 8(4.26)     | 13(7.6)      | 7(4.05)     | 10(3.75)    | 55(5.2)       |
| 55_01B       | 0(0)        | 0(0)       | 0(0)        | 1(0.58)      | 1(0.58)     | 6(2.25)     | 8(0.76)       |
| B            | 35(50)      | 75(39.89)  | 57(30.32)   | 35(20.47)    | 31(17.92)   | 33(12.36)   | 266(25.17)    |
| C            | 1(1.43)     | 4(2.13)    | 5(2.66)     | 7(4.09)      | 8(4.62)     | 8(3)        | 33(3.12)      |
| Minor        | 2(2.86)     | 10(5.32)   | 11(5.85)    | 9(5.26)      | 9(5.2)      | 12(4.49)    | 53(5.01)      |
| URF          | 2(2.86)     | 2(1.06)    | 4(2.13)     | 9(5.26)      | 6(3.47)     | 12(4.49)    | 35(3.31)      |
| Total        | 70(100.01)  | 188(100)   | 188(100.01) | 171(99.98)   | 173(100)    | 267(100)    | 1057(100)     |

URF, unique recombinant form.

Minor, A1, D, F1, G, H, CRF02\_AG, CRF03\_AB, CRF06\_cpx, CRF15\_01B, CRF18\_cpx, CRF24\_BG, CRF33\_01B, CRF55\_01B, CRF57\_BC, CRF58\_01B, CRF59\_01B, CRF61\_BC, CRF62\_BC, CRF63\_02A1, CRF64\_BC, CRF65\_cpx, CRF67\_01B, CRF68\_01B, CRF78\_cpx, CRF79\_0107, CRF82\_cpx, CRF83\_cpx, CRF85\_BC, CRF86\_BC, CRF87\_cpx, CRF88\_BC, and CRF96\_cpx.

Table S4. HIV subtype trend for ethnicity

|                   | 1994-2005  | 2006-2008   | 2009-2011   | 2012-2014   | 2015-2017   | 2018-2020   | Total       |
|-------------------|------------|-------------|-------------|-------------|-------------|-------------|-------------|
| Han               |            |             |             |             |             |             |             |
| 01_AE             | 29(16.76)  | 262(34.66)  | 869(48.55)  | 1326(52.93) | 1728(47.37) | 1520(44.16) | 5734(46.56) |
| 07_BC             | 20(11.56)  | 108(14.29)  | 360(20.11)  | 577(23.03)  | 1025(28.1)  | 1045(30.36) | 3135(25.46) |
| 08_BC             | 5(2.89)    | 22(2.91)    | 16(0.89)    | 25(1)       | 31(0.85)    | 31(0.9)     | 130(1.06)   |
| 55_01B            | 0(0)       | 2(0.26)     | 12(0.67)    | 23(0.92)    | 64(1.75)    | 95(2.76)    | 196(1.59)   |
| B                 | 107(61.85) | 329(43.52)  | 447(24.97)  | 373(14.89)  | 368(10.09)  | 230(6.68)   | 1854(15.06) |
| C                 | 3(1.73)    | 10(1.32)    | 12(0.67)    | 19(0.76)    | 26(0.71)    | 19(0.55)    | 89(0.72)    |
| Minor             | 6(3.47)    | 17(2.25)    | 28(1.56)    | 34(1.36)    | 99(2.71)    | 136(3.95)   | 320(2.6)    |
| URF               | 3(1.73)    | 6(0.79)     | 46(2.57)    | 128(5.11)   | 307(8.42)   | 366(10.63)  | 856(6.95)   |
| Total             | 173(99.99) | 756(100)    | 1790(99.99) | 2505(100)   | 3648(100)   | 3442(99.99) | 12314(100)  |
| Uyghur            |            |             |             |             |             |             |             |
| 01_AE             | 0(0)       | 2(1.44)     | 1(1.85)     | 1(3.45)     | 0(0)        | 1(16.67)    | 5(1.69)     |
| 07_BC             | 40(100)    | 130(93.53)  | 50(92.59)   | 26(89.66)   | 26(96.3)    | 5(83.33)    | 277(93.9)   |
| 08_BC             | 0(0)       | 0(0)        | 0(0)        | 0(0)        | 0(0)        | 0(0)        | 0(0)        |
| 55_01B            | 0(0)       | 0(0)        | 0(0)        | 0(0)        | 0(0)        | 0(0)        | 0(0)        |
| B                 | 0(0)       | 3(2.16)     | 3(5.56)     | 2(6.9)      | 0(0)        | 0(0)        | 8(2.71)     |
| C                 | 0(0)       | 1(0.72)     | 0(0)        | 0(0)        | 0(0)        | 0(0)        | 1(0.34)     |
| Minor             | 0(0)       | 1(0.72)     | 0(0)        | 0(0)        | 1(3.7)      | 0(0)        | 2(0.68)     |
| URF               | 0(0)       | 2(1.44)     | 0(0)        | 0(0)        | 0(0)        | 0(0)        | 2(0.68)     |
| Total             | 40(100)    | 139(100.01) | 54(100)     | 29(100.01)  | 27(100)     | 6(100)      | 295(100)    |
| Yi                |            |             |             |             |             |             |             |
| 01_AE             | 0(0)       | 1(2.86)     | 0(0)        | 4(11.76)    | 0(0)        | 0(0)        | 5(3.55)     |
| 07_BC             | 1(50)      | 33(94.29)   | 32(84.21)   | 28(82.35)   | 17(85)      | 10(83.33)   | 121(85.82)  |
| 08_BC             | 0(0)       | 0(0)        | 1(2.63)     | 1(2.94)     | 2(10)       | 0(0)        | 4(2.84)     |
| 55_01B            | 0(0)       | 0(0)        | 0(0)        | 0(0)        | 0(0)        | 0(0)        | 0(0)        |
| B                 | 0(0)       | 0(0)        | 3(7.89)     | 0(0)        | 0(0)        | 0(0)        | 3(2.13)     |
| C                 | 1(50)      | 1(2.86)     | 0(0)        | 0(0)        | 0(0)        | 0(0)        | 2(1.42)     |
| Minor             | 0(0)       | 0(0)        | 0(0)        | 0(0)        | 0(0)        | 0(0)        | 0(0)        |
| URF               | 0(0)       | 0(0)        | 2(5.26)     | 1(2.94)     | 1(5)        | 2(16.67)    | 6(4.26)     |
| Total             | 2(100)     | 35(100.01)  | 38(99.99)   | 34(99.99)   | 20(100)     | 12(100)     | 141(100.02) |
| Other ethnicities |            |             |             |             |             |             |             |
| 01_AE             | 4(50)      | 12(18.75)   | 32(42.11)   | 56(50.91)   | 67(54.92)   | 47(47)      | 218(45.42)  |
| 07_BC             | 0(0)       | 14(21.88)   | 18(23.68)   | 27(24.55)   | 37(30.33)   | 36(36)      | 132(27.5)   |
| 08_BC             | 0(0)       | 6(9.38)     | 3(3.95)     | 3(2.73)     | 0(0)        | 1(1)        | 13(2.71)    |
| 55_01B            | 0(0)       | 0(0)        | 1(1.32)     | 1(0.91)     | 2(1.64)     | 4(4)        | 8(1.67)     |
| B                 | 3(37.5)    | 26(40.63)   | 19(25)      | 11(10)      | 9(7.38)     | 5(5)        | 73(15.21)   |
| C                 | 1(12.5)    | 3(4.69)     | 0(0)        | 2(1.82)     | 1(0.82)     | 0(0)        | 7(1.46)     |
| Minor             | 0(0)       | 2(3.13)     | 2(2.63)     | 2(1.82)     | 1(0.82)     | 1(1)        | 8(1.67)     |
| URF               | 0(0)       | 1(1.56)     | 1(1.32)     | 8(7.27)     | 5(4.1)      | 6(6)        | 21(4.38)    |
| Total             | 8(100)     | 64(100.02)  | 76(100.01)  | 110(100.01) | 122(100.01) | 100(100)    | 480(100.02) |

Data are n(%).

URF, unique recombinant form.

Minor, A1, D, F1, G, H, CRF02\_AG, CRF03\_AB, CRF06\_cpx, CRF15\_01B, CRF18\_cpx, CRF24\_BG, CRF33\_01B, CRF55\_01B, CRF57\_BC, CRF58\_01B, CRF59\_01B, CRF61\_BC, CRF62\_BC, CRF63\_02A1, CRF64\_BC, CRF65\_cpx, CRF67\_01B, CRF68\_01B, CRF78\_cpx, CRF79\_0107, CRF82\_cpx, CRF83\_cpx, CRF85\_BC, CRF86\_BC, CRF87\_cpx, CRF88\_BC, and CRF96\_cpx.

Table S5. HIV subtype trend for age (years)

|        | 1994-2005  | 2006-2008   | 2009-2011   | 2012-2014    | 2015-2017   | 2018-2020    | Total        |
|--------|------------|-------------|-------------|--------------|-------------|--------------|--------------|
| <18    |            |             |             |              |             |              |              |
| 01_AE  | 2(13.33)   | 2(7.41)     | 3(20)       | 4(50)        | 4(25)       | 5(55.56)     | 20(22.22)    |
| 07_BC  | 5(33.33)   | 6(22.22)    | 4(26.67)    | 1(12.5)      | 8(50)       | 2(22.22)     | 26(28.89)    |
| 08_BC  | 0(0)       | 1(3.7)      | 0(0)        | 0(0)         | 0(0)        | 0(0)         | 1(1.11)      |
| 55_01B | 0(0)       | 0(0)        | 0(0)        | 0(0)         | 1(6.25)     | 0(0)         | 1(1.11)      |
| B      | 8(53.33)   | 15(55.56)   | 6(40)       | 2(25)        | 1(6.25)     | 1(11.11)     | 33(36.67)    |
| C      | 0(0)       | 1(3.7)      | 0(0)        | 1(12.5)      | 1(6.25)     | 0(0)         | 3(3.33)      |
| Minor  | 0(0)       | 2(7.41)     | 1(6.67)     | 0(0)         | 0(0)        | 0(0)         | 3(3.33)      |
| URF    | 0(0)       | 0(0)        | 1(6.67)     | 0(0)         | 1(6.25)     | 1(11.11)     | 3(3.33)      |
| Total  | 15(99.99)  | 27(100)     | 15(100.01)  | 8(100)       | 16(100)     | 9(100)       | 90(99.99)    |
| 18-24  |            |             |             |              |             |              |              |
| 01_AE  | 9(24.32)   | 62(31.79)   | 194(55.27)  | 210(53.85)   | 304(48.87)  | 208(42.19)   | 987(47.27)   |
| 07_BC  | 11(29.73)  | 66(33.85)   | 82(23.36)   | 106(27.18)   | 210(33.76)  | 186(37.73)   | 661(31.66)   |
| 08_BC  | 0(0)       | 7(3.59)     | 2(0.57)     | 0(0)         | 2(0.32)     | 1(0.2)       | 12(0.57)     |
| 55_01B | 0(0)       | 0(0)        | 3(0.85)     | 7(1.79)      | 10(1.61)    | 11(2.23)     | 31(1.48)     |
| B      | 14(37.84)  | 54(27.69)   | 54(15.38)   | 38(9.74)     | 42(6.75)    | 20(4.06)     | 222(10.63)   |
| C      | 0(0)       | 3(1.54)     | 1(0.28)     | 1(0.26)      | 1(0.16)     | 4(0.81)      | 10(0.48)     |
| Minor  | 1(2.7)     | 2(1.03)     | 7(1.99)     | 6(1.54)      | 8(1.29)     | 16(3.25)     | 40(1.92)     |
| URF    | 2(5.41)    | 1(0.51)     | 8(2.28)     | 22(5.64)     | 45(7.23)    | 47(9.53)     | 125(5.99)    |
| Total  | 37(100)    | 195(100)    | 351(99.98)  | 390(100)     | 622(99.99)  | 493(100)     | 2088(100)    |
| 25-44  |            |             |             |              |             |              |              |
| 01_AE  | 15(10.2)   | 183(28.33)  | 584(45.38)  | 978(53.65)   | 1113(49.42) | 993(46.34)   | 3866(46.59)  |
| 07_BC  | 45(30.61)  | 188(29.1)   | 303(23.54)  | 432(23.7)    | 623(27.66)  | 634(29.58)   | 2225(26.81)  |
| 08_BC  | 5(3.4)     | 18(2.79)    | 9(0.7)      | 21(1.15)     | 18(0.8)     | 16(0.75)     | 87(1.05)     |
| 55_01B | 0(0)       | 2(0.31)     | 7(0.54)     | 14(0.77)     | 37(1.64)    | 57(2.66)     | 117(1.41)    |
| B      | 72(48.98)  | 228(35.29)  | 324(25.17)  | 260(14.26)   | 230(10.21)  | 132(6.16)    | 1246(15.02)  |
| C      | 5(3.4)     | 8(1.24)     | 9(0.7)      | 10(0.55)     | 8(0.36)     | 10(0.47)     | 50(0.6)      |
| Minor  | 5(3.4)     | 13(2.01)    | 18(1.4)     | 20(1.1)      | 42(1.87)    | 69(3.22)     | 167(2.01)    |
| URF    | 0(0)       | 6(0.93)     | 33(2.56)    | 88(4.83)     | 181(8.04)   | 232(10.83)   | 540(6.51)    |
| Total  | 147(99.99) | 646(100)    | 1287(99.99) | 1823(100.01) | 2252(100)   | 2143(100.01) | 8298(100)    |
| 45-64  |            |             |             |              |             |              |              |
| 01_AE  | 6(28.57)   | 26(23.21)   | 114(41.76)  | 171(42.75)   | 338(41.17)  | 316(40.46)   | 971(40.32)   |
| 07_BC  | 0(0)       | 21(18.75)   | 62(22.71)   | 104(26)      | 221(26.92)  | 227(29.07)   | 635(26.37)   |
| 08_BC  | 0(0)       | 2(1.79)     | 7(2.56)     | 7(1.75)      | 11(1.34)    | 9(1.15)      | 36(1.5)      |
| 55_01B | 0(0)       | 0(0)        | 3(1.1)      | 3(0.75)      | 17(2.07)    | 27(3.46)     | 50(2.08)     |
| B      | 14(66.67)  | 56(50)      | 76(27.84)   | 79(19.75)    | 93(11.33)   | 73(9.35)     | 391(16.24)   |
| C      | 0(0)       | 3(2.68)     | 2(0.73)     | 7(1.75)      | 15(1.83)    | 4(0.51)      | 31(1.29)     |
| Minor  | 0(0)       | 2(1.79)     | 3(1.1)      | 9(2.25)      | 47(5.72)    | 46(5.89)     | 107(4.44)    |
| URF    | 1(4.76)    | 2(1.79)     | 6(2.2)      | 20(5)        | 79(9.62)    | 79(10.12)    | 187(7.77)    |
| Total  | 21(100)    | 112(100.01) | 273(100)    | 400(100)     | 821(100)    | 781(100.01)  | 2408(100.01) |
| ≥65    |            |             |             |              |             |              |              |
| 01_AE  | 1(33.33)   | 4(40)       | 6(20)       | 24(42.11)    | 35(33.33)   | 41(32.28)    | 111(33.43)   |

|        |          |         |           |           |            |            |            |
|--------|----------|---------|-----------|-----------|------------|------------|------------|
| 07_BC  | 0(0)     | 1(10)   | 9(30)     | 15(26.32) | 43(40.95)  | 46(36.22)  | 114(34.34) |
| 08_BC  | 0(0)     | 0(0)    | 2(6.67)   | 1(1.75)   | 2(1.9)     | 6(4.72)    | 11(3.31)   |
| 55_01B | 0(0)     | 0(0)    | 0(0)      | 0(0)      | 1(0.95)    | 4(3.15)    | 5(1.51)    |
| B      | 2(66.67) | 4(40)   | 11(36.67) | 7(12.28)  | 11(10.48)  | 9(7.09)    | 44(13.25)  |
| C      | 0(0)     | 0(0)    | 0(0)      | 2(3.51)   | 2(1.9)     | 1(0.79)    | 5(1.51)    |
| Minor  | 0(0)     | 1(10)   | 1(3.33)   | 1(1.75)   | 4(3.81)    | 6(4.72)    | 13(3.92)   |
| URF    | 0(0)     | 0(0)    | 1(3.33)   | 7(12.28)  | 7(6.67)    | 14(11.02)  | 29(8.73)   |
| Total  | 3(100)   | 10(100) | 30(100)   | 57(100)   | 105(99.99) | 127(99.99) | 332(100)   |

Data are n(%).

URF, unique recombinant form.

Minor, A1, D, F1, G, H, CRF02\_AG, CRF03\_AB, CRF06\_cpx, CRF15\_01B, CRF18\_cpx, CRF24\_BG, CRF33\_01B, CRF55\_01B, CRF57\_BC, CRF58\_01B, CRF59\_01B, CRF61\_BC, CRF62\_BC, CRF63\_02A1, CRF64\_BC, CRF65\_cpx, CRF67\_01B, CRF68\_01B, CRF78\_cpx, CRF79\_0107, CRF82\_cpx, CRF83\_cpx, CRF85\_BC, CRF86\_BC, CRF87\_cpx, CRF88\_BC, and CRF96\_cpx.

Table S6. Characteristics of clusters for subtype B, CRF01\_AE, and CRF07\_BC

|                     | Men         | Women      | CD4           | Age          | Han         | Uyghur     | Yi         | Others   | Heterosexual | MSM         | IDU        | Blood transmission | Mother to child | North       | North-east | East       | Central-south | South-west | North-west |
|---------------------|-------------|------------|---------------|--------------|-------------|------------|------------|----------|--------------|-------------|------------|--------------------|-----------------|-------------|------------|------------|---------------|------------|------------|
| <b>B Cluster</b>    |             |            |               |              |             |            |            |          |              |             |            |                    |                 |             |            |            |               |            |            |
| 1                   | 1769(97.36) | 48(2.64)   | 306(178-450)  | 32(27-40)    | 1291(95.35) | 4(0.3)     | 3(0.22)    | 56(4.14) | 363(19.61)   | 1446(78.12) | 21(1.13)   | 21(1.13)           | 0(0)            | 954(51.21)  | 214(11.49) | 292(15.67) | 252(13.53)    | 82(4.4)    | 69(3.7)    |
| 2                   | 111(63.43)  | 64(36.57)  | 258(92-375.5) | 39(33-51)    | 159(96.36)  | 1(0.61)    | 0(0)       | 5(3.03)  | 134(44.67)   | 28(9.33)    | 34(11.33)  | 101(33.67)         | 3(1)            | 63(20.66)   | 25(8.2)    | 47(15.41)  | 114(37.38)    | 50(16.39)  | 6(1.97)    |
| 3                   | 286(70.44)  | 120(29.56) | 315(174-428)  | 38(29-49)    | 326(96.45)  | 1(0.3)     | 0(0)       | 11(3.25) | 194(34.22)   | 154(27.16)  | 7(1.23)    | 205(36.16)         | 7(1.23)         | 159(27.65)  | 34(5.91)   | 94(16.35)  | 259(45.04)    | 14(2.43)   | 15(2.61)   |
| <b>01AE Cluster</b> |             |            |               |              |             |            |            |          |              |             |            |                    |                 |             |            |            |               |            |            |
| 1                   | 1881(97.41) | 50(2.59)   | 335(204-466)  | 31(26-41)    | 1345(95.46) | 0(0)       | 2(0.14)    | 62(4.4)  | 356(18.28)   | 1571(80.69) | 19(0.98)   | 1(0.05)            | 0(0)            | 793(40.63)  | 541(27.72) | 247(12.65) | 262(13.42)    | 58(2.97)   | 51(2.61)   |
| 2                   | 383(79.13)  | 101(20.87) | 285(93-410)   | 37(28-49.75) | 366(97.86)  | 0(0)       | 0(0)       | 8(2.14)  | 592(64.77)   | 224(24.51)  | 72(7.88)   | 20(2.19)           | 6(0.66)         | 166(18.06)  | 38(4.13)   | 192(20.89) | 410(44.61)    | 107(11.64) | 6(0.65)    |
| 3                   | 392(98.99)  | 4(1.01)    | 344(235-484)  | 30(26-38.5)  | 308(96.55)  | 0(0)       | 0(0)       | 11(3.45) | 70(17.68)    | 324(81.82)  | 2(0.51)    | 0(0)               | 0(0)            | 206(52.02)  | 41(10.35)  | 74(18.69)  | 43(10.86)     | 19(4.8)    | 13(3.28)   |
| 4                   | 1360(97.98) | 28(2.02)   | 337(215-461)  | 30(25-37)    | 969(96.51)  | 1(0.1)     | 1(0.1)     | 33(3.29) | 237(16.64)   | 1164(81.74) | 18(1.26)   | 5(0.35)            | 0(0)            | 638(44.87)  | 148(10.41) | 293(20.6)  | 238(16.74)    | 53(3.73)   | 52(3.66)   |
| 5                   | 2352(98.7)  | 31(1.3)    | 321(178-456)  | 30(26-37)    | 1245(95.92) | 2(0.15)    | 0(0)       | 51(3.93) | 349(14.2)    | 2080(84.62) | 19(0.77)   | 10(0.41)           | 0(0)            | 676(27.48)  | 207(8.41)  | 996(40.49) | 370(15.04)    | 134(5.45)  | 77(3.13)   |
| 6                   | 232(99.57)  | 1(0.43)    | 351(219-500)  | 33(28-46.25) | 181(94.27)  | 0(0)       | 0(0)       | 11(5.73) | 34(14.47)    | 199(84.68)  | 2(0.85)    | 0(0)               | 0(0)            | 144(61.28)  | 22(9.36)   | 25(10.64)  | 28(11.91)     | 7(2.98)    | 9(3.83)    |
| 7                   | 295(96.72)  | 10(3.28)   | 3-422.25)     | 33(27-44)    | 251(97.67)  | 0(0)       | 0(0)       | 6(2.33)  | 66(22)       | 228(76)     | 5(1.67)    | 1(0.33)            | 0(0)            | 151(50)     | 41(13.58)  | 40(13.25)  | 41(13.58)     | 10(3.31)   | 19(6.29)   |
| <b>07BC Cluster</b> |             |            |               |              |             |            |            |          |              |             |            |                    |                 |             |            |            |               |            |            |
| 1                   | 2888(97.44) | 76(2.56)   | 363(255-500)  | 31(26-42)    | 1913(96.57) | 0(0)       | 3(0.15)    | 65(3.28) | 476(15.9)    | 2485(83)    | 27(0.9)    | 6(0.2)             | 0(0)            | 1023(34.09) | 281(9.36)  | 589(19.63) | 681(22.69)    | 324(10.8)  | 103(3.43)  |
| 2                   | 759(77.13)  | 225(22.87) | 364(241-506)  | 33(26-41)    | 482(52.97)  | 276(30.33) | 117(12.86) | 35(3.85) | 430(25.97)   | 223(13.47)  | 979(59.12) | 21(1.27)           | 3(0.18)         | 277(16.61)  | 72(4.32)   | 98(5.88)   | 181(10.85)    | 709(42.51) | 331(9.84)  |
| 3                   | 825(97.75)  | 19(2.25)   | 362(257-487)  | 31(26-41)    | 540(96.09)  | 1(0.18)    | 1(0.18)    | 20(3.56) | 133(15.38)   | 718(83.01)  | 11(1.27)   | 3(0.35)            | 0(0)            | 310(35.8)   | 77(8.89)   | 161(18.59) | 217(25.06)    | 75(8.66)   | 26(3)      |
| 4                   | 259(98.85)  | 3(1.15)    | 417(275-515)  | 30(26-37)    | 177(94.15)  | 0(0)       | 0(0)       | 11(5.85) | 47(17.67)    | 217(81.58)  | 1(0.38)    | 1(0.38)            | 0(0)            | 113(42.16)  | 29(10.82)  | 32(11.94)  | 69(25.75)     | 15(5.6)    | 10(3.73)   |

Data are n(%), or median (IQR).

MSM, Man who have sex with man.

North, Beijing, Tianjin, Hebei, Shanxi, and Inner Mongolia.



North-east, Liaoning, Jilin, and Heilongjiang.

East, Shanghai, Jiangsu, Zhejiang, Anhui, Fujian, Jiangxi, and Shandong.

Central- south, Henan, Hubei, Hunan, Guangdong, Guangxi, and Hainan.

South-west, Chongqing, Sichuan, Guizhou, Yunnan, and Tibet.

North-west, Shann'xi, Gansu, Qinghai, Ningxia, and Sinkiang.

Table S7. Risk factors for slower progression to AIDSAD in Chinese patients (excluding heterosexual)

|                               | Number of sequences | AIDSAD prevalence <sup>a</sup> | Univariable analysis <sup>b</sup> |         | Multivariable analysis <sup>c</sup> |         |
|-------------------------------|---------------------|--------------------------------|-----------------------------------|---------|-------------------------------------|---------|
|                               |                     |                                | OR (95% CI)                       | P value | OR (95% CI)                         | P value |
| Sex                           |                     |                                |                                   |         |                                     |         |
| Men                           | 7483                | 1543(20.62)                    | Reference                         |         |                                     |         |
| Women                         | 99                  | 36(36.36)                      | 2.2(1.44-3.31)                    | 0.001   | 1.07(0.58-1.94)                     | 0.81    |
| Age at diagnosis(years) group |                     |                                |                                   |         |                                     |         |
| <18                           | 43                  | 8(18.6)                        | Reference                         |         |                                     |         |
| 18-24                         | 1331                | 166(12.47)                     | 0.62(0.3-1.47)                    | 0.24    | 1.56(0.6-4.98)                      | 0.4     |
| 25-44                         | 4985                | 1027(20.6)                     | 1.14(0.55-2.64)                   | 0.75    | 2.75(1.07-8.69)                     | 0.05    |
| 45-64                         | 1109                | 341(30.75)                     | 1.94(0.94-4.55)                   | 0.09    | 4.6(1.78-14.57)                     | 0.001   |
| ≥65                           | 111                 | 36(32.43)                      | 2.1(0.92-5.28)                    | 0.09    | 5.88(2.09-19.74)                    | 0.001   |
| Ethnicity                     |                     |                                |                                   |         |                                     |         |
| Han                           | 7173                | 1508(21.02)                    | Reference                         |         |                                     |         |
| Uyghur                        | 79                  | 8(10.13)                       | 0.42(0.19-0.83)                   | 0.02    | 0.74(0.3-1.6)                       | 0.47    |
| Yi                            | 72                  | 7(9.72)                        | 0.4(0.17-0.82)                    | 0.02    | 0.63(0.25-1.39)                     | 0.28    |
| Other                         | 258                 | 56(21.71)                      | 1.04(0.76-1.4)                    | 0.79    | 1.11(0.81-1.5)                      | 0.51    |
| Transmission risk group       |                     |                                |                                   |         |                                     |         |
| MSM                           | 7084                | 1454(20.53)                    | Reference                         |         |                                     |         |
| Injecting drug user           | 312                 | 51(16.35)                      | 0.76(0.55-1.02)                   | 0.07    | 1.16(0.78-1.67)                     | 0.45    |
| Blood transfusion             | 112                 | 51(45.54)                      | 3.24(2.22-4.71)                   | 0       | 2.72(1.64-4.51)                     | 0.001   |
| Mother to child               | 10                  | 4(40)                          | 2.58(0.66-9.05)                   | 0.14    | 6.4(1.22-33.1)                      | 0.02    |
| Subtype                       |                     |                                |                                   |         |                                     |         |
| B                             | 1009                | 283(28.05)                     | Reference                         |         |                                     |         |
| C                             | 25                  | 5(20)                          | 0.64(0.21-1.6)                    | 0.38    | 0.74(0.24-1.94)                     | 0.57    |
| 01_AE                         | 3663                | 855(23.34)                     | 0.78(0.67-0.92)                   | 0       | 0.85(0.72-1.01)                     | 0.06    |
| 07_BC                         | 2069                | 281(13.58)                     | 0.4(0.33-0.49)                    | 0.0001  | 0.42(0.34-0.51)                     | 0.0001  |

|                |      |            |                 |      |                 |       |
|----------------|------|------------|-----------------|------|-----------------|-------|
| 08_BC          | 27   | 10(37.04)  | 1.51(0.66-3.28) | 0.31 | 1.42(0.61-3.16) | 0.4   |
| 55_01B         | 122  | 22(18.03)  | 0.56(0.34-0.9)  | 0.02 | 0.53(0.31-0.85) | 0.01  |
| URF            | 526  | 93(17.68)  | 0.55(0.42-0.71) | 0    | 0.53(0.4-0.7)   | 0.001 |
| Minor          | 1009 | 283(28.05) | 0.69(0.45-1.05) | 0.09 | 0.6(0.38-0.92)  | 0.02  |
| Region         |      |            |                 |      |                 |       |
| North          | 3606 | 758(21.02) | Reference       |      |                 |       |
| North-east     | 1138 | 235(20.65) | 0.98(0.83-1.15) | 0.79 |                 |       |
| East           | 941  | 192(20.4)  | 0.96(0.8-1.15)  | 0.68 |                 |       |
| Central-south  | 955  | 207(21.68) | 1.04(0.87-1.23) | 0.66 |                 |       |
| South-west     | 515  | 108(20.97) | 1(0.79-1.25)    | 0.98 |                 |       |
| North-west     | 404  | 72(17.82)  | 0.81(0.62-1.06) | 0.13 |                 |       |
| Sampling Phase |      |            |                 |      |                 |       |
| 1994-2005      | 48   | 16(33.33)  | Reference       |      |                 |       |
| 2006-2008      | 393  | 85(21.63)  | 0.55(0.29-1.08) | 0.07 | 0.66(0.33-1.36) | 0.25  |
| 2009-2011      | 1126 | 232(20.6)  | 0.52(0.28-0.98) | 0.04 | 0.74(0.38-1.51) | 0.4   |
| 2012-2014      | 1971 | 362(18.37) | 0.45(0.25-0.85) | 0.01 | 0.71(0.36-1.44) | 0.32  |
| 2015-2017      | 2429 | 531(21.86) | 0.56(0.31-1.05) | 0.06 | 0.92(0.47-1.87) | 0.81  |
| 2018-2020      | 1615 | 353(21.86) | 0.56(0.31-1.06) | 0.06 | 0.94(0.48-1.92) | 0.85  |

AIDSAD, AIDS at diagnose.

OR, odds ratio.

MSM, Man who have sex with man.

URF, unique recombinant form.

North, Beijing, Tianjin, Hebei, Shanxi, and Inner Mongolia.

North-east, Liaoning, Jilin, and Heilongjiang.

East, Shanghai, Jiangsu, Zhejiang, Anhui, Fujian, Jiangxi, and Shandong.

Central- south, Henan, Hubei, Hunan, Guangdong, Guangxi, and Hainan.

South-west, Chongqing, Sichuan, Guizhou, Yunnan, and Tibet.

North-west, Shann'xi, Gansu, Qinghai, Ningxia, and Sinkiang.

Minor, A1, D, F1, G, H, CRF02\_AG, CRF03\_AB, CRF06\_cpx, CRF15\_01B, CRF18\_cpx, CRF24\_BG, CRF33\_01B, CRF55\_01B, CRF57\_BC, CRF58\_01B, CRF59\_01B, CRF61\_BC, CRF62\_BC, CRF63\_02A1, CRF64\_BC, CRF65\_cpx, CRF67\_01B, CRF68\_01B, CRF78\_cpx, CRF79\_0107, CRF82\_cpx, CRF83\_cpx, CRF85\_BC, CRF86\_BC, CRF87\_cpx, CRF88\_BC, and CRF96\_cpx.

aData are n (%).

bUnivariable logistic regression analysis.

cMultivariable logistic regression analysis.

Table S8. Risk factors for slower progression to AIDSAD in Chinese patients(excluding MSM)

|                               | Number of sequences | AIDSAD prevalence <sup>a</sup> | Univariable analysis <sup>b</sup> |         | Multivariable analysis <sup>c</sup> |         |
|-------------------------------|---------------------|--------------------------------|-----------------------------------|---------|-------------------------------------|---------|
|                               |                     |                                | OR (95% CI)                       | P value | OR (95% CI)                         | P value |
| Sex                           |                     |                                |                                   |         |                                     |         |
| Men                           | 2597                | 756(29.11)                     | Reference                         |         |                                     |         |
| Women                         | 758                 | 210(27.7)                      | 0.93(0.78-1.12)                   | 0.45    | 0.88(0.72-1.07)                     | 0.19    |
| Age at diagnosis(years) group |                     |                                |                                   |         |                                     |         |
| <18                           | 26                  | 9(34.62)                       | Reference                         |         |                                     |         |
| 18-24                         | 354                 | 45(12.71)                      | 0.28(0.12-0.68)                   | 0.004   | 0.56(0.18-1.86)                     | 0.32    |
| 25-44                         | 1909                | 516(27.03)                     | 0.7(0.32-1.65)                    | 0.39    | 1.28(0.44-4.1)                      | 0.66    |
| 45-64                         | 927                 | 337(36.35)                     | 1.08(0.49-2.56)                   | 0.86    | 1.96(0.67-6.3)                      | 0.23    |
| ≥65                           | 136                 | 58(42.65)                      | 1.4(0.6-3.51)                     | 0.45    | 2.99(0.97-10.03)                    | 0.06    |
| Ethnicity                     |                     |                                |                                   |         |                                     |         |
| Han                           | 91                  | 8(8.79)                        | Reference                         |         |                                     |         |
| Uyghur                        | 81                  | 5(6.17)                        | 0.23(0.1-0.44)                    | 0.0001  | 0.45(0.18-1.03)                     | 0.07    |
| Yi                            | 131                 | 44(33.59)                      | 0.16(0.05-0.35)                   | 0.0001  | 0.32(0.11-0.79)                     | 0.02    |
| Other                         | 91                  | 8(8.79)                        | 1.19(0.82-1.72)                   | 0.35    | 1.34(0.89-1.98)                     | 0.15    |
| Transmission risk group       |                     |                                |                                   |         |                                     |         |
| Heterosexual                  | 2857                | 841(29.44)                     | Reference                         |         |                                     |         |
| Injecting drug user           | 312                 | 51(16.35)                      | 0.47(0.34-0.63)                   | 0.0001  | 0.87(0.6-1.24)                      | 0.45    |
| Blood transfusion             | 112                 | 51(45.54)                      | 2(1.37-2.93)                      | 0.0001  | 1.84(1.2-2.82)                      | 0.0001  |
| Mother to child               | 10                  | 4(40)                          | 1.6(0.41-5.61)                    | 0.47    | 3.23(0.55-18.82)                    | 0.18    |
| Subtype                       |                     |                                |                                   |         |                                     |         |
| B                             | 625                 | 228(36.48)                     | Reference                         |         |                                     |         |
| C                             | 53                  | 16(30.19)                      | 0.75(0.4-1.36)                    | 0.36    | 0.88(0.46-1.64)                     | 0.7     |
| 01_AE                         | 1256                | 430(34.24)                     | 0.91(0.74-1.11)                   | 0.34    | 0.98(0.79-1.23)                     | 0.89    |
| 07_BC                         | 974                 | 172(17.66)                     | 0.37(0.3-0.47)                    | 0.0001  | 0.44(0.34-0.57)                     | 0.0001  |
| 08_BC                         | 77                  | 22(28.57)                      | 0.7(0.41-1.16)                    | 0.17    | 0.67(0.38-1.14)                     | 0.15    |

|                |      |            |                 |       |                 |      |
|----------------|------|------------|-----------------|-------|-----------------|------|
| 55_01B         | 49   | 19(38.78)  | 1.1(0.6-1.99)   | 0.75  | 1.16(0.62-2.13) | 0.63 |
| URF            | 201  | 52(25.87)  | 0.61(0.42-0.86) | 0.01  | 0.64(0.44-0.93) | 0.02 |
| Minor          | 625  | 228(36.48) | 0.51(0.31-0.79) | 0.004 | 0.54(0.33-0.86) | 0.01 |
| Region         |      |            |                 |       |                 |      |
| North          | 1594 | 468(29.36) | Reference       |       |                 |      |
| North-east     | 389  | 113(29.05) | 0.99(0.77-1.25) | 0.9   | 1.01(0.78-1.3)  | 0.95 |
| East           | 340  | 108(31.76) | 1.12(0.87-1.44) | 0.38  | 1.1(0.84-1.43)  | 0.5  |
| Central-south  | 457  | 147(32.17) | 1.14(0.91-1.43) | 0.25  | 1.01(0.79-1.29) | 0.94 |
| South-west     | 338  | 75(22.19)  | 0.69(0.52-0.9)  | 0.01  | 1.14(0.83-1.55) | 0.42 |
| North-west     | 219  | 48(21.92)  | 0.68(0.48-0.94) | 0.02  | 1.26(0.84-1.86) | 0.01 |
| Sampling Phase |      |            |                 |       |                 |      |
| 1994-2005      | 52   | 16(30.77)  | Reference       |       |                 |      |
| 2006-2008      | 315  | 86(27.3)   | 0.84(0.45-1.64) | 0.61  |                 |      |
| 2009-2011      | 527  | 179(33.97) | 1.16(0.64-2.2)  | 0.64  |                 |      |
| 2012-2014      | 715  | 173(24.2)  | 0.72(0.4-1.36)  | 0.29  |                 |      |
| 2015-2017      | 742  | 218(29.38) | 0.94(0.52-1.77) | 0.83  |                 |      |
| 2018-2020      | 1004 | 294(29.28) | 0.93(0.52-1.75) | 0.82  |                 |      |

AIDSAD, AIDS at diagnose.

OR, odds ratio.

MSM, Man who have sex with man.

URF, unique recombinant form.

North, Beijing, Tianjin, Hebei, Shanxi, and Inner Mongolia.

North-east, Liaoning, Jilin, and Heilongjiang.

East, Shanghai, Jiangsu, Zhejiang, Anhui, Fujian, Jiangxi, and Shandong.

Central- south, Henan, Hubei, Hunan, Guangdong, Guangxi, and Hainan.

South-west, Chongqing, Sichuan, Guizhou, Yunnan, and Tibet.

North-west, Shann'xi, Gansu, Qinghai, Ningxia, and Sinkiang.

Minor, A1, D, F1, G, H, CRF02\_AG, CRF03\_AB, CRF06\_cpx, CRF15\_01B, CRF18\_cpx, CRF24\_BG, CRF33\_01B, CRF55\_01B, CRF57\_BC, CRF58\_01B, CRF59\_01B, CRF61\_BC, CRF62\_BC, CRF63\_02A1, CRF64\_BC, CRF65\_cpx, CRF67\_01B, CRF68\_01B, CRF78\_cpx, CRF79\_0107, CRF82\_cpx, CRF83\_cpx, CRF85\_BC, CRF86\_BC, CRF87\_cpx, CRF88\_BC, and CRF96\_cpx.

aData are n (%).

bUnivariable logistic regression analysis.

cMultivariable logistic regression analysis.

Table S9. Risk factors for slower progression to AIDSAD in Chinese patients (excluding injecting drug user)

|                               | Number of sequences | AIDSAD prevalence <sup>a</sup> | Univariable analysis <sup>b</sup> |         | Multivariable analysis <sup>c</sup> |         |
|-------------------------------|---------------------|--------------------------------|-----------------------------------|---------|-------------------------------------|---------|
|                               |                     |                                | OR (95% CI)                       | P value | OR (95% CI)                         | P value |
| Sex                           |                     |                                |                                   |         |                                     |         |
| Men                           | 9403                | 2166(23.04)                    | Reference                         |         |                                     |         |
| Women                         | 724                 | 203(28.04)                     | 1.3(1.1-1.54)                     | 0.002   | 0.85(0.7-1.04)                      | 0.11    |
| Age at diagnosis(years) group |                     |                                |                                   |         |                                     |         |
| <18                           | 48                  | 10(20.83)                      | Reference                         |         |                                     |         |
| 18-24                         | 1577                | 205(13)                        | 0.57(0.29-1.22)                   | 0.12    | 1.17(0.5-3.15)                      | 0.74    |
| 25-44                         | 6321                | 1421(22.48)                    | 1.1(0.57-2.34)                    | 0.79    | 2.1(0.91-5.62)                      | 0.11    |
| 45-64                         | 1937                | 642(33.14)                     | 1.88(0.97-4.02)                   | 0.08    | 3.49(1.51-9.39)                     | 0.01    |
| ≥65                           | 240                 | 91(37.92)                      | 2.32(1.14-5.13)                   | 0.03    | 4.82(2-13.33)                       | 0.001   |
| Ethnicity                     |                     |                                |                                   |         |                                     |         |
| Han                           | 9711                | 2274(23.42)                    | Reference                         |         |                                     |         |
| Uyghur                        | 26                  | 1(3.85)                        | 0.13(0.01-0.62)                   | 0.05    | 0.22(0.01-1.09)                     | 0.15    |
| Yi                            | 27                  | 2(7.41)                        | 0.26(0.04-0.88)                   | 0.07    | 0.37(0.06-1.28)                     | 0.18    |
| Other                         | 363                 | 92(25.34)                      | 1.11(0.87-1.41)                   | 0.4     | 1.14(0.89-1.46)                     | 0.3     |
| Transmission risk group       |                     |                                |                                   |         |                                     |         |
| Heterosexual                  | 2857                | 841(29.44)                     | Reference                         |         |                                     |         |
| MSM                           | 7084                | 1454(20.53)                    | 0.62(0.56-0.68)                   | 0.001   | 0.67(0.6-0.75)                      | 0.001   |
| Blood transfusion             | 112                 | 51(45.54)                      | 2(1.37-2.93)                      | 0.001   | 1.9(1.26-2.86)                      | 0.001   |
| Mother to child               | 10                  | 4(40)                          | 1.6(0.41-5.61)                    | 0.47    | 3.68(0.74-17.54)                    | 0.1     |
| Subtype                       |                     |                                |                                   |         |                                     |         |
| B                             | 1488                | 444(29.84)                     | Reference                         |         |                                     |         |
| C                             | 70                  | 19(27.14)                      | 0.88(0.5-1.48)                    | 0.63    | 0.8(0.45-1.37)                      | 0.42    |
| 01_AE                         | 4753                | 1246(26.22)                    | 0.84(0.74-0.95)                   | 0.01    | 0.95(0.83-1.09)                     | 0.5     |
| 07_BC                         | 2619                | 397(15.16)                     | 0.42(0.36-0.49)                   | 0.0001  | 0.46(0.39-0.54)                     | 0.0001  |



|                |      |             |                 |       |                 |       |
|----------------|------|-------------|-----------------|-------|-----------------|-------|
| 08_BC          | 87   | 26(29.89)   | 1(0.62-1.59)    | 0.99  | 0.79(0.48-1.27) | 0.34  |
| 55_01B         | 167  | 41(24.55)   | 0.77(0.52-1.1)  | 0.16  | 0.8(0.54-1.16)  | 0.25  |
| URF            | 693  | 140(20.2)   | 0.6(0.48-0.74)  | 0.001 | 0.63(0.51-0.79) | 0.001 |
| Minor          | 1488 | 444(29.84)  | 0.68(0.49-0.93) | 0.02  | 0.59(0.42-0.82) | 0.002 |
| Region         |      |             |                 |       |                 |       |
| North          | 4987 | 1178(23.62) | Reference       |       |                 |       |
| North-east     | 1459 | 334(22.89)  | 0.96(0.83-1.1)  | 0.56  | 0.96(0.83-1.1)  | 0.56  |
| East           | 1237 | 291(23.52)  | 0.99(0.86-1.15) | 0.94  | 0.99(0.86-1.15) | 0.94  |
| Central-south  | 1298 | 304(23.42)  | 0.99(0.86-1.14) | 0.88  | 0.99(0.86-1.14) | 0.88  |
| South-west     | 658  | 154(23.4)   | 0.99(0.81-1.19) | 0.9   | 0.99(0.81-1.19) | 0.9   |
| North-west     | 465  | 101(21.72)  | 0.9(0.71-1.12)  | 0.36  | 0.9(0.71-1.12)  | 0.36  |
| Sampling Phase |      |             |                 |       |                 |       |
| 1994-2005      | 64   | 18(28.13)   | Reference       |       |                 |       |
| 2006-2008      | 518  | 123(23.75)  | 0.8(0.45-1.45)  | 0.44  | 0.8(0.45-1.45)  | 0.44  |
| 2009-2011      | 1476 | 360(24.39)  | 0.82(0.48-1.48) | 0.5   | 0.82(0.48-1.48) | 0.5   |
| 2012-2014      | 2461 | 503(20.44)  | 0.66(0.38-1.17) | 0.14  | 0.66(0.38-1.17) | 0.14  |
| 2015-2017      | 3039 | 724(23.82)  | 0.8(0.47-1.42)  | 0.43  | 0.8(0.47-1.42)  | 0.43  |
| 2018-2020      | 2569 | 641(24.95)  | 0.85(0.5-1.51)  | 0.56  | 0.85(0.5-1.51)  | 0.56  |

AIDSAD, AIDS at diagnose.

OR, odds ratio.

MSM, Man who have sex with man.

URF, unique recombinant form.

North, Beijing, Tianjin, Hebei, Shanxi, and Inner Mongolia.

North-east, Liaoning, Jilin, and Heilongjiang.

East, Shanghai, Jiangsu, Zhejiang, Anhui, Fujian, Jiangxi, and Shandong.

Central- south, Henan, Hubei, Hunan, Guangdong, Guangxi, and Hainan.

South-west, Chongqing, Sichuan, Guizhou, Yunnan, and Tibet.

North-west, Shann'xi, Gansu, Qinghai, Ningxia, and Sinkiang.

Minor, A1, D, F1, G, H, CRF02\_AG, CRF03\_AB, CRF06\_cpx, CRF15\_01B, CRF18\_cpx, CRF24\_BG, CRF33\_01B, CRF55\_01B, CRF57\_BC, CRF58\_01B, CRF59\_01B, CRF61\_BC, CRF62\_BC, CRF63\_02A1, CRF64\_BC, CRF65\_cpx, CRF67\_01B, CRF68\_01B, CRF78\_cpx, CRF79\_0107, CRF82\_cpx, CRF83\_cpx, CRF85\_BC, CRF86\_BC, CRF87\_cpx, CRF88\_BC, and CRF96\_cpx.

aData are n (%).

bUnivariable logistic regression analysis.

cMultivariable logistic regression analysis.

Table S10. Results from the multi-variable linear regression analysis

|           | Estimate Coefficients(IC 95%) | Std.Error | T value | P       |
|-----------|-------------------------------|-----------|---------|---------|
| Intercept | 436.6(398.4-474.9)            | 19.5      | 22.36   | <0.0001 |
| Sex       | 9.2(-7.1-25.6)                | 8.4       | 1.1     | 0.27    |
| Age       | -42.5(-48.7--36.2)            | 3.2       | -13.4   | <0.0001 |
| Ethnicity | 0.9(-6-7.8)                   | 3.5       | 0.27    | 0.79    |
| Risk      | 14.4(6.7-22.1)                | 3.9       | 3.66    | 0.0002  |
| Subtype   | 12.4(9.7-15)                  | 1.3       | 9.2     | <0.0001 |
| Region    | -4.1(-6.6--1.5)               | 1.3       | -3.07   | 0.002   |
| Period    | -5.6(-9.1--2)                 | 1.8       | -3.05   | 0.002   |

Sex:Man,1;Woman,2

Age(years):<18 ,1; (18-24) ,2;(25-44) ,3; (45-64),4; >65,5

Transmission risk group:Heterosexual,1; MSM,2; IDU,3; Blood,4; Mother to child,5

Subtype: B,1; C,2; 01\_AE,3; 07\_BC,4; 08\_BC,5, 55\_01B,6; URF,7; Other, 8

Ethnicity: Han, 1; Uygur,2; Yi,3; Other,4

Region: North,1; North-east,2; East,3; Central-south,4; South-west,5; North-west,6

Period (Calender year): 1994-2005,1; 2006-2008,2; 2009-2011,3; 2012-2014,4;

2015-2017,5; 2018-2020,6

Table S11. Correlation matrix of the variables

|           | CD4   | Sex   | Age   | Ethnicity | Risk  | Subtype | Region | Period |
|-----------|-------|-------|-------|-----------|-------|---------|--------|--------|
| CD4       | 1     | -0.01 | -0.14 | 0.01      | 0.06  | 0.08    | -0.01  | -0.03  |
| Sex       | -0.01 | 1     | 0.08  | 0.03      | -0.24 | -0.03   | 0.06   | -0.08  |
| Age       | -0.14 | 0.08  | 1     | -0.03     | -0.18 | 0.04    | -0.13  | 0.11   |
| Ethnicity | 0.01  | 0.03  | -0.03 | 1         | 0.04  | 0       | 0.08   | -0.05  |
| Risk      | 0.06  | -0.24 | -0.18 | 0.04      | 1     | -0.03   | 0.08   | -0.15  |
| Subtype   | 0.08  | -0.03 | 0.04  | 0         | -0.03 | 1       | 0.02   | 0.26   |
| Region    | -0.01 | 0.06  | -0.13 | 0.08      | 0.08  | 0.02    | 1      | -0.05  |
| Period    | -0.03 | -0.08 | 0.11  | -0.05     | -0.15 | 0.26    | -0.05  | 1      |

Sex:Man,1;Woman,2

Age(years):<18 ,1; (18-24) ,2;(25-44) ,3; (45-64),4; >65,5

Transmission risk group:Heterosexual,1; MSM,2; IDU,3; Blood,4; Mother to child,5

Subtype: B,1; C,2; 01\_AE,3; 07\_BC,4; 08\_BC,5, 55\_01B,6; URF,7; Other, 8

Ethnicity: Han, 1; Uygur,2; Yi,3; Other,4

Region: North,1; North-east,2; East,3; Central-south,4; South-west,5; North-west,6

Period (Calender year): 1994-2005,1; 2006-2008,2; 2009-2011,3; 2012-2014,4;

2015-2017,5; 2018-2020,6

Table S12. Probability matrix of the variables

|           | CD4  | Sex | Age | Ethnicity | Risk | Subtype | Region | Period |
|-----------|------|-----|-----|-----------|------|---------|--------|--------|
| CD4       | 0    | 1   | 0   | 1         | 0    | 0       | 1      | 0.04   |
| Sex       | 0.26 | 0   | 0   | 0.02      | 0    | 0.01    | 0      | 0      |
| Age       | 0    | 0   | 0   | 0.01      | 0    | 0       | 0      | 0      |
| Ethnicity | 0.4  | 0   | 0   | 0         | 0    | 1       | 0      | 0      |
| Risk      | 0    | 0   | 0   | 0         | 0    | 0       | 0      | 0      |
| Subtype   | 0    | 0   | 0   | 0.94      | 0    | 0       | 0.09   | 0      |
| Region    | 0.55 | 0   | 0   | 0         | 0    | 0.02    | 0      | 0      |
| Period    | 0.01 | 0   | 0   | 0         | 0    | 0       | 0      | 0      |

Sex: Man,1; Woman,2

Age(years): <18 ,1; (18-24) ,2; (25-44) ,3; (45-64),4; >65,5

Transmission risk group: Heterosexual,1; MSM,2; IDU,3; Blood,4; Mother to child,5

Subtype: B,1; C,2; 01\_AE,3; 07\_BC,4; 08\_BC,5, 55\_01B,6; URF,7; Other, 8

Ethnicity: Han, 1; Uygur,2; Yi,3; Other,4

Region: North,1; North-east,2; East,3; Central-south,4; South-west,5; North-west,6

Period (Calender year): 1994-2005,1; 2006-2008,2; 2009-2011,3; 2012-2014,4;

2015-2017,5; 2018-2020,6
